# Supplementary material
Source: PubMed Central journal article supplement (PMC4988177)
Supplement: AEM.00953-16_zam017167354so1.pdf [file AEM.00953-16_zam017167354so1.pdf]

## **Supplementary material and methods**

### **Decontamination and *de novo* assembly of *Ridgeia* symbiont genomes**

#### **First assembly and data quality assessment**

Raw reads were first assembled at Canada's Michael Smith Genome Sciences Centre using Abyss and preliminary quality assessments of the resulting scaffolds performed with Quast (1). All but one of the samples resulted in assemblies of poor quality (N50 < 1000). The very high quantity of scaffolds containing repetitive sequences, characteristic of eukaryote DNA, indicated significant contamination from worm genetic material. The highest quality sample (Ind 11; N50 = 61 758) had a bimodal distribution of GC% and a heterogeneous distribution of k-mer frequencies, evidence of a strong, distinct symbiont signal with fewer contaminating scaffolds than the other assemblies. This assembly was uploaded into the IMG-ER platform for gene calling and decontamination.

#### **Decontamination**

The Abyss assembly of Ind 11 was manually curated from potential contaminating scaffolds using a combination of reference dependant and independent methods according to JGI's Single Cell Data Decontamination guide. First, we considered scaffolds of lengths  $\geq 1000$  bp and used the IMG/ER embedded k-mer Frequency Analysis tool to generate a k-mer plot using the following parameters; window size=1000, fragment step=100, oligomer size=4 bp, minimum variation=10. Scaffolds out or extending out of the main scaffold cluster were tagged as contaminants if their respective gene counts were  $\leq 1$  (large intergenic sequences are not expected in bacterial genomes which have high gene density) or if they did not contained at least one gene phylogenetically affiliated to the genome of the close relative *Riftia pachyptila* symbiont (2). Contaminant scaffolds were then removed from the genome assembly. Finally, scaffolds smaller than 1000 bp with at least one gene phylogenetically affiliated to the genome of the *Riftia pachyptila* symbiont were added to the curated assembly. The resulting curated assembly GC% frequency distribution was unimodal with a mode at 60% of GC as for the *Riftia* and *Tevnia* symbiont genomes.

#### ***De novo* assembly**

Raw paired-end reads were filtered with Prinseq (3), to remove nucleotides with a quality score inferior to 20 on both ends of each read. Ind 11 reads were then mapped onto the curated assembly using Bowtie2 (4) and the mapped reads were extracted with Samtools (5).

Next, these 'good' reads were assembled with SPAdes (6) using the following k-mer sizes: 26, 55, 67, 85, 89, 95 & 99. Scaffolding was performed with SSPACE-standard (7) and resulted in a high quality assembly of the metagenome of *Ridgeia* symbionts. We will refer to this assembly as the *Ridgeia* 1 symbiont.

Finally, we used the *Ridgeia* 1 symbiont assembly to map and extract the symbiont reads from the Hiseq and Miseq data from the five other samples. These data were pooled to increase the depth of coverage and the subsequent assembly quality. The reads were assembled with SPAdes using the same parameters as for *Ridgeia* 1 symbiont but with the additional k-mer size 127 to account for the longer reads generated by the MiSeq platform. This pooled assembly is referred to as the *Ridgeia* 2 symbiont.

## References

1. Gurevich A, Saveliev V, Vyahhi N, Tesler G. 2013. QUILT: quality assessment tool for genome assemblies. *Bioinformatics* **29**:1072–1075.
2. Robidart JC, Bench SR, Feldman RA, Novoradovsky A, Podell SB, Gaasterland T, Allen EE, Felbeck H. 2008. Metabolic versatility of the *Riftia pachyptila* endosymbiont revealed through metagenomics. *Environ Microbiol* **10**:727–737.
3. Schmieder R, Edwards R. 2011. Quality control and preprocessing of metagenomic datasets. *Bioinformatics* **27**:863–864.
4. Langmead B, Salzberg SL. 2012. Fast gapped-read alignment with Bowtie 2. *Nat Methods* **9**:357–359.
5. Li H, Handsaker B, Wysoker A, Fennell T, Ruan J, Homer N, Marth G, Abecasis G, Durbin R, Subgroup 1000 Genome Project Data Processing. 2009. The sequence alignment/map format and SAMtools. *Bioinformatics* **25**:2078–2079.
6. Bankevich A, Nurk S, Antipov D, Gurevich AA, Dvorkin M, Kulikov AS, Lesin VM, Nikolenko SI, Pham S, Prjibelski AD, Pyshkin AV, Sirotkin AV, Vyahhi N, Tesler G, Alekseyev MA, Pevzner PA. 2012. SPAdes: a new genome assembly algorithm and its applications to single-cell sequencing. *J Comput Biol* **19**:455–477.
7. Boetzer M, Henkel CV, Jansen HJ, Butler D, Pirovano W. 2011. Scaffolding pre-assembled contigs using SSPACE. *Bioinformatics* **27**:578–579.

## Supplementary tables

**Table S1** Accessory genome exclusive to *Ridgeia* symbionts (*Ridgeia* 1 and *Ridgeia* 2 symbiont genome assemblies).

**Table S2** Accessory genome exclusive to the East Pacific Rise symbionts (*Tevnia*, *Rifita* 1, and *Rifita* 2 symbiont genome assemblies).

**Table S3** Accessory genome found in *Riftia* symbionts (*Rifita* 1 and *Rifita* 2 symbiont genome assemblies).

**Table S4** Accessory genome found in 9°N symbionts (*Tevnia* and *Rifita* 2 symbiont genome assemblies but not in *Rifita* 1 symbionts).

**Table S5** Genes of particular interest. **Modified** or **complemented** from Gardebrecht *et al.* (1).

1. Gardebrecht A, Markert S, Sievert SM, Felbeck H, Thürmer A, Albrecht D, Wollherr A, Kabisch J, Le Bris N, Lehmann R. 2011. Physiological homogeneity among the endosymbionts of *Riftia pachyptila* and *Tevnia jerichonana* revealed by proteogenomics. *ISME J* **6**:766–776.

[Back to list of tables](#)

**Table S1 Accessory genome exclusive to *Ridgeia* symbionts (*Ridgeia* 1 and *Ridgeia* 2 symbiont genome assemblies).** Total size = 95 456 bp; n.a. = Not Annotated; presence of sequence or part of sequence but no genes were called. **(Continued)**

| Exclusive sequence<br>Reference contig<br>sequence length<br>Start - End positions<br>(in reference contig) | Low flanking<br>conservation | Locus-tag in <i>Ridgeia</i> 1<br>symbionts                      | Locus-tag in <i>Ridgeia</i> 2<br>symbionts | Product                                                                                    |                  |                                                            |
|-------------------------------------------------------------------------------------------------------------|------------------------------|-----------------------------------------------------------------|--------------------------------------------|--------------------------------------------------------------------------------------------|------------------|------------------------------------------------------------|
| Exclusive sequence 1<br>Ga0074115_146<br>17457<br>0 - 17457                                                 |                              | Ga0074115_1461                                                  | Ga0076813_11512                            | Curli production assembly/transport component CsgG                                         |                  |                                                            |
|                                                                                                             |                              | Ga0074115_1462                                                  | Ga0076813_11513                            | Zn-binding Pro-Ala-Ala-Arg (PAAR) domain-containing protein, involved in TypeVI secretion  |                  |                                                            |
|                                                                                                             |                              | Ga0074115_1463                                                  | Ga0076813_11514                            | Methyltransferase domain-containing protein                                                |                  |                                                            |
|                                                                                                             |                              | Ga0074115_1464                                                  | Ga0076813_14753                            | Protein of unknown function (DUF1795)                                                      |                  |                                                            |
|                                                                                                             |                              | Ga0074115_1465                                                  | Ga0076813_14752                            | Hypothetical protein                                                                       |                  |                                                            |
|                                                                                                             |                              | Ga0074115_1466                                                  | Ga0076813_14751;<br>Ga0076813_16801        | Type VI secretion protein, EvpB/VC_A0108 family/Type VI secretion protein, VC_A0107 family |                  |                                                            |
|                                                                                                             |                              | Ga0074115_1467                                                  | Ga0076813_16802                            | Type VI secretion system secreted protein VgrG                                             |                  |                                                            |
|                                                                                                             |                              | Ga0074115_1468                                                  | Ga0076813_16803                            | Hypothetical protein                                                                       |                  |                                                            |
|                                                                                                             |                              | Ga0074115_1469                                                  | Ga0076813_16804                            | Type VI secretion system protein ImpA                                                      |                  |                                                            |
|                                                                                                             |                              | Ga0074115_14610                                                 | Ga0076813_16805                            | Type VI secretion system protein ImpB                                                      |                  |                                                            |
|                                                                                                             |                              | Ga0074115_14611                                                 | Ga0076813_13723                            | Type VI secretion system protein ImpC                                                      |                  |                                                            |
|                                                                                                             |                              | Ga0074115_14612                                                 | Ga0076813_13722                            | Type VI secretion system secreted protein Hcp                                              |                  |                                                            |
|                                                                                                             |                              | Ga0074115_14613                                                 | Ga0076813_13721;<br>Ga0076813_14484        | ImpE protein                                                                               |                  |                                                            |
|                                                                                                             |                              | Ga0074115_14614                                                 | Ga0076813_14483                            | Type VI secretion system protein ImpF                                                      |                  |                                                            |
|                                                                                                             |                              | Ga0074115_14615                                                 | Ga0076813_14482                            | Type VI secretion system protein ImpG                                                      |                  |                                                            |
|                                                                                                             |                              | Ga0074115_14616                                                 | Ga0076813_14481                            | Type VI secretion system protein ImpH                                                      |                  |                                                            |
|                                                                                                             |                              | Exclusive sequence 2<br>Ga0074115_125<br>11590<br>33173 - 44763 | ✓                                          | Ga0074115_12524                                                                            | Ga0076813_10858  | WxcM-like, C-terminal                                      |
|                                                                                                             |                              |                                                                 |                                            | Ga0074115_12525                                                                            | Ga0076813_10859  | UDP-3-O-[3-hydroxymyristoyl] glucosamine N-acyltransferase |
|                                                                                                             |                              |                                                                 |                                            | Ga0074115_12526                                                                            | Ga0076813_108510 | Hypothetical protein                                       |
|                                                                                                             |                              |                                                                 |                                            | Ga0074115_12527                                                                            | Ga0076813_108511 | Hydroxymethylglutaryl-CoA synthase                         |
| Ga0074115_12528                                                                                             | Ga0076813_108512             |                                                                 |                                            | Acyl carrier protein                                                                       |                  |                                                            |
| Ga0074115_12529                                                                                             | Ga0076813_108513             |                                                                 |                                            | dTDP-4-amino-4,6-dideoxygalactose transaminase                                             |                  |                                                            |
| Ga0074115_12530                                                                                             | Ga0076813_108514             |                                                                 |                                            | Glycosyl transferase family 2                                                              |                  |                                                            |
| Ga0074115_12531                                                                                             | Ga0076813_108515             |                                                                 |                                            | Lipopolysaccharide transport system permease protein                                       |                  |                                                            |
| Ga0074115_12532                                                                                             | Ga0076813_108516             |                                                                 |                                            | ABC-2 type transport system ATP-binding protein                                            |                  |                                                            |
| Ga0074115_12533                                                                                             | Ga0076813_108517             |                                                                 |                                            | Glycosyl transferases group 1                                                              |                  |                                                            |
| Ga0074115_12534                                                                                             | Ga0076813_108518             |                                                                 |                                            | Hypothetical protein                                                                       |                  |                                                            |
| Ga0074115_12535                                                                                             | Ga0076813_108519             |                                                                 |                                            | Glycosyltransferase involved in cell wall bisynthesis                                      |                  |                                                            |
| Ga0074115_12536                                                                                             | Ga0076813_108520             |                                                                 |                                            | Hypothetical protein                                                                       |                  |                                                            |
| Exclusive sequence 3<br>Ga0074115_157<br>8235<br>0 - 8235                                                   |                              |                                                                 |                                            | Ga0074115_1571                                                                             | Ga0076813_10168  | Hypothetical protein                                       |
|                                                                                                             |                              | Ga0074115_1572                                                  | Ga0076813_10167                            | Hypothetical protein                                                                       |                  |                                                            |
|                                                                                                             |                              | Ga0074115_1573                                                  | Ga0076813_10166                            | Hypothetical protein                                                                       |                  |                                                            |
|                                                                                                             |                              | Ga0074115_1574                                                  | Ga0076813_10165                            | Hypothetical protein                                                                       |                  |                                                            |
|                                                                                                             |                              | Ga0074115_1575                                                  | Ga0076813_10164                            | TerY-C metal binding domain                                                                |                  |                                                            |
|                                                                                                             |                              | Ga0074115_1576                                                  | Ga0076813_10163                            | Hypothetical protein                                                                       |                  |                                                            |
|                                                                                                             |                              | Ga0074115_1577                                                  | Ga0076813_10162                            | Mobile mystery protein A                                                                   |                  |                                                            |
|                                                                                                             |                              | Ga0074115_1578                                                  | Ga0076813_10162;<br>Ga0076813_16633        | Mobile mystery protein B                                                                   |                  |                                                            |
|                                                                                                             |                              | Ga0074115_1579                                                  | Ga0076813_16632                            | Fic/DOC family protein                                                                     |                  |                                                            |
|                                                                                                             |                              | Ga0074115_15710                                                 | Ga0076813_14733;<br>Ga0076813_16631        | Hypothetical protein                                                                       |                  |                                                            |
|                                                                                                             |                              | Ga0074115_15711                                                 | Ga0076813_14732                            | Predicted nuclease of the RNase H fold, HicB family                                        |                  |                                                            |
|                                                                                                             |                              | Ga0074115_15712                                                 | Ga0076813_14731                            | Protein of unknown function (DUF3732)                                                      |                  |                                                            |
|                                                                                                             |                              | Ga0074115_15713                                                 | n.a.                                       | Hypothetical protein                                                                       |                  |                                                            |
| Exclusive sequence 4<br>Ga0074115_147<br>8311<br>0 - 8311                                                   |                              | n.a.                                                            | Ga0076813_142210                           | Transposase                                                                                |                  |                                                            |
|                                                                                                             |                              | Ga0074115_1471                                                  | Ga0076813_14229                            | Protein of unknown function DUF91                                                          |                  |                                                            |
|                                                                                                             |                              | Ga0074115_1472                                                  | Ga0076813_14228                            | Hypothetical protein                                                                       |                  |                                                            |
|                                                                                                             |                              | Ga0074115_1473                                                  | Ga0076813_14227                            | Relaxase/Mobilisation nuclease domain-containing protein                                   |                  |                                                            |
|                                                                                                             |                              | Ga0074115_1474                                                  | Ga0076813_14226                            | Hypothetical protein                                                                       |                  |                                                            |
|                                                                                                             |                              | Ga0074115_1475                                                  | Ga0076813_14225                            | Hypothetical protein                                                                       |                  |                                                            |
|                                                                                                             |                              | Ga0074115_1476                                                  | Ga0076813_14224                            | Hypothetical protein                                                                       |                  |                                                            |
| Exclusive sequence 5<br>Ga0074115_105<br>7528                                                               | ✓                            | Ga0074115_1477                                                  | Ga0076813_14223                            | Hypothetical protein                                                                       |                  |                                                            |
|                                                                                                             |                              | Ga0074115_1478                                                  | Ga0076813_14222                            | tRNA-splicing ligase RtcB                                                                  |                  |                                                            |
|                                                                                                             |                              | Ga0074115_105110                                                | Ga0076813_13394                            | Hypothetical protein                                                                       |                  |                                                            |
|                                                                                                             |                              | Ga0074115_105111                                                | Ga0076813_11781;<br>Ga0076813_14331;       | Methyltransferase domain-containing protein                                                |                  |                                                            |

[Back to list of tables](#)

**Table S1 Accessory genome exclusive to *Ridgeia* symbionts (*Ridgeia* 1 and *Ridgeia* 2 symbiont genome assemblies).** Total size = 95 456 bp; n.a. = Not Annotated; presence of sequence or part of sequence but no genes were called. **(Continued)**

| Exclusive sequence<br>Reference contig<br>sequence length<br>Start - End positions<br>(in reference contig) | Low flanking<br>conservation | Locus-tag in <i>Ridgeia</i> 1<br>symbionts                                                                             | Locus-tag in <i>Ridgeia</i> 2<br>symbionts                                                                                              | Product                                                                                                                                                                                                                                                                                                |
|-------------------------------------------------------------------------------------------------------------|------------------------------|------------------------------------------------------------------------------------------------------------------------|-----------------------------------------------------------------------------------------------------------------------------------------|--------------------------------------------------------------------------------------------------------------------------------------------------------------------------------------------------------------------------------------------------------------------------------------------------------|
| 121389 - 128917                                                                                             |                              | Ga0074115_105112                                                                                                       | Ga0076813_13762<br>Ga0076813_13761;<br>Ga0076813_12832                                                                                  | Hypothetical protein                                                                                                                                                                                                                                                                                   |
| Exclusive sequence 6<br>Ga0074115_132<br>7011<br>25125 - 32136                                              |                              | Ga0074115_105113<br>Ga0074115_13218<br>Ga0074115_13219<br>Ga0074115_13220<br>Ga0074115_13221<br>Ga0074115_13222        | Ga0076813_12831<br>Ga0076813_14266<br>Ga0076813_14265<br>Ga0076813_14264<br>Ga0076813_14263<br>Ga0076813_14262                          | Hypothetical protein<br>Carbohydrate binding domain-containing protein<br>Hypothetical protein<br>Hypothetical protein<br>GntR family transcriptional regulator<br>Tripartite-type tricarboxylate transporter, receptor<br>component TctC<br>Tripartite tricarboxylate transporter TctB family protein |
| Exclusive sequence 7<br>Ga0074115_109<br>4694<br>1942 - 6636                                                | ✓                            | Ga0074115_1094<br>Ga0074115_1095<br><br>Ga0074115_1096<br>Ga0074115_1098<br>Ga0074115_1097                             | Ga0076813_16722<br>Ga0076813_16721;<br>Ga0076813_10881;<br>Ga0076813_14464<br>Ga0076813_14463<br>Ga0076813_14462<br>Ga0076813_14461     | CRISPR-associated protein, Csd2 family<br>CRISPR-associated protein Csd1<br><br>CRISPR-associated protein, Cas5d family<br>Hypothetical protein<br>Hypothetical protein                                                                                                                                |
| Exclusive sequence 8<br>Ga0074115_141<br>4127<br>0 - 4127                                                   |                              | Ga0074115_1411;<br>Ga0074115_1412<br>Ga0074115_1413                                                                    | Ga0076813_10531<br>Ga0076813_10532                                                                                                      | Hypothetical protein<br>Hypothetical protein                                                                                                                                                                                                                                                           |
| Exclusive sequence 9<br>Ga0074115_103<br>2816<br>141098 - 143914                                            | ✓                            | Ga0074115_103137<br>Ga0074115_103138<br><br>Ga0074115_103139                                                           | Ga0076813_16812<br>Ga0076813_16811;<br>Ga0076813_14381<br>Ga0076813_14382                                                               | Type I secretion system ABC transporter, HlyB family<br>Hemolysin D<br>Hypothetical protein                                                                                                                                                                                                            |
| Exclusive sequence 10<br>Ga0074115_114<br>2482<br>43812 - 46294                                             |                              | Ga0074115_11438<br>Ga0074115_11439<br>n.a.<br>Ga0074115_11440<br>Ga0074115_11441<br>Ga0074115_11442<br>Ga0074115_11443 | Ga0076813_127316<br>Ga0076813_127315<br>Ga0076813_127314<br>Ga0076813_127313<br>Ga0076813_127312<br>Ga0076813_127310<br>Ga0076813_12739 | Hypothetical protein<br>Hypothetical protein<br>Hypothetical protein<br>Integrase core domain-containing protein<br>HTH-like domain-containing protein<br>Hypothetical protein<br>Transposase                                                                                                          |
| Exclusive sequence 11<br>Ga0074115_170<br>2271<br>0 - 2271                                                  |                              | Ga0074115_1701<br>Ga0074115_1702<br>Ga0074115_1703<br>Ga0074115_1704                                                   | n.a.<br>Ga0076813_13551<br>Ga0076813_13552<br>n.a.                                                                                      | Cation diffusion facilitator family transporter<br>AcrB/AcrD/AcrF family protein<br>AcrB/AcrD/AcrF family protein<br>Hypothetical protein                                                                                                                                                              |
| Exclusive sequence 12<br>Ga0074115_132<br>2223<br>3349 - 5572                                               |                              | Ga0074115_1641                                                                                                         | Ga0076813_14711                                                                                                                         | PKD repeat-containing protein                                                                                                                                                                                                                                                                          |
| Exclusive sequence 13<br>Ga0074115_161<br>2011<br>3372 - 5383                                               | ✓                            | Ga0074115_1614<br>Ga0074115_1615                                                                                       | Ga0076813_13865<br>Ga0076813_13866                                                                                                      | Transposase<br>Transposase IS66 family protein                                                                                                                                                                                                                                                         |
| Exclusive sequence 14<br>Ga0074115_159<br>1926<br>0 - 1926                                                  |                              | Ga0074115_1591                                                                                                         | Ga0076813_14181                                                                                                                         | Secreted protein containing bacterial Ig-like domain and<br>vWFA domain                                                                                                                                                                                                                                |
| Exclusive sequence 15<br>Ga0074115_123<br>1831<br>335 - 2166                                                | ✓                            | Ga0074115_1232<br>Ga0074115_1233                                                                                       | Ga0076813_14196<br>Ga0076813_14195                                                                                                      | TIGR02452 family protein<br>Hypothetical protein                                                                                                                                                                                                                                                       |
| Exclusive sequence 16                                                                                       |                              | n.a.                                                                                                                   | Ga0076813_14051                                                                                                                         | Transcriptional regulatory protein, C terminal                                                                                                                                                                                                                                                         |

[Back to list of tables](#)

**Table S1 Accessory genome exclusive to *Ridgeia* symbionts (*Ridgeia* 1 and *Ridgeia* 2 symbiont genome assemblies).** Total size = 95 456 bp; n.a. = Not Annotated; presence of sequence or part of sequence but no genes were called. **(Continued)**

| Exclusive sequence<br>Reference contig<br>sequence length<br>Start - End positions<br>(in reference contig) | Low flanking<br>conservation | Locus-tag in <i>Ridgeia</i> 1<br>symbionts | Locus-tag in <i>Ridgeia</i> 2<br>symbionts | Product                                                                            |
|-------------------------------------------------------------------------------------------------------------|------------------------------|--------------------------------------------|--------------------------------------------|------------------------------------------------------------------------------------|
| Ga0074115_140<br>1736<br>0 – 1736                                                                           |                              | Ga0074115_10577<br>Ga0074115_10578         | Ga0076813_14053<br>Ga0076813_14052         | Carbon-nitrogen hydrolase<br>ubiE/COQ5 methyltransferase family protein            |
| Exclusive sequence 17<br>Ga0074115_132<br>1726<br>0 - 1726                                                  |                              | n.a.<br>Ga0074115_1321                     | Ga0076813_15291<br>Ga0076813_15292         | Transposase<br>Hypothetical protein                                                |
| Exclusive sequence 18<br>Ga0074115_180<br>1396<br>0 – 1396                                                  |                              | Ga0074115_1801<br>Ga0074115_1802           | Ga0076813_11412<br>Ga0076813_11411         | Spherulation-specific family 4<br>Hypothetical protein                             |
| Exclusive sequence 19<br>Ga0074115_102<br>1154<br>129891 – 131045                                           | ✓                            | Ga0074115_102124<br>Ga0074115_102125       | Ga0076813_169035<br>Ga0076813_169034       | Putative transposase<br>Putative transposase                                       |
| Exclusive sequence 20<br>Ga0074115_165<br>903<br>2388 – 3291                                                |                              | Ga0074115_1654                             | Ga0076813_10561                            | Hypothetical protein                                                               |
| Exclusive sequence 21<br>Ga0074115_126<br>856<br>11285 – 12141                                              |                              | Ga0074115_1262<br>Ga0074115_1263           | Ga0076813_11072<br>Ga0076813_11402         | Hypothetical protein<br>Hypothetical protein                                       |
| Exclusive sequence 22<br>Ga0074115_143<br>852<br>15512 – 16364                                              |                              | Ga0074115_14312<br>Ga0074115_14313         | Ga0076813_15414<br>Ga0076813_15415         | Nitrate/nitrite transport system substrate-binding protein<br>Hypothetical protein |
| Exclusive sequence 23<br>Ga0074115_156<br>628<br>6057 – 6685                                                | ✓                            | Ga0074115_1567                             | Ga0076813_13514                            | Aminoacyl-tRNA editing domain-containing protein                                   |
| Exclusive sequence 24<br>Ga0074115_156<br>591<br>4884 – 5475                                                | ✓                            | Ga0074115_1566                             | Ga0076813_13515                            | Hypothetical protein                                                               |
| Exclusive sequence 25<br>Ga0074115_118<br>586<br>61784 – 62370                                              |                              | Ga0074115_11853                            | Ga0076813_16776                            | Chemoreceptor zinc-binding domain-containing protein                               |
| Exclusive sequence 26<br>Ga0074115_112<br>515<br>0 - 515                                                    |                              | Ga0074115_1121                             | Ga0076813_16143                            | Hypothetical protein                                                               |

[Back to list of tables](#)

**Table S2 Accessory genome exclusive to the East Pacific Rise symbionts (*Tevnia*, *Rifita 1*, and *Rifita 2* symbiont genome assemblies).** Total size = 141 335 bp; n.a. = Not Annotated; presence of sequence or part of sequence but no genes were called. **(Continued)**

| Exclusive sequence<br>Reference contig<br>Sequence length<br>Start - End positions<br>(in reference contig) | Low flanking<br>conservation | Locus-tag in <i>Tevnia</i><br>symbionts | Locus-tag in <i>Rifita 1</i><br>symbionts                  | Locus-tag in <i>Rifita 2</i><br>symbionts | Product                                                                                                                        |
|-------------------------------------------------------------------------------------------------------------|------------------------------|-----------------------------------------|------------------------------------------------------------|-------------------------------------------|--------------------------------------------------------------------------------------------------------------------------------|
| Exclusive sequence 1<br>AFZB01000005<br>33791<br>69865 - 103656                                             |                              | TevJSym_ae00610;<br>TevJSym_ae00620     | Rifp1Sym_dq00030                                           | Rifp2Sym_fc00010                          | Anaerobic dimethyl sulfoxide reductase subunit A                                                                               |
|                                                                                                             |                              | n.a.                                    | n.a.                                                       | Rifp2Sym_fc00020                          | Hypothetical protein                                                                                                           |
|                                                                                                             |                              | TevJSym_ae00630                         | n.a.                                                       | Rifp2Sym_fc00030                          | Hypothetical protein                                                                                                           |
|                                                                                                             |                              | TevJSym_ae00640                         | Rifp1Sym_dq00020                                           | Rifp2Sym_fc00040                          | Transcriptional regulator, ArsR family                                                                                         |
|                                                                                                             |                              | TevJSym_ae00650                         | Rifp1Sym_gl00020                                           | Rifp2Sym_fc00050                          | Fatty acid hydroxylase                                                                                                         |
|                                                                                                             |                              | TevJSym_ae00660                         | Rifp1Sym_gl00040                                           | Rifp2Sym_fc00060                          | Uncharacterized membrane protein YdjX, TVP38/TMEM64 family, SNARE-associated domain                                            |
|                                                                                                             |                              | TevJSym_ae00670                         | Rifp1Sym_gl00060                                           | Rifp2Sym_fc00070                          | Hypothetical protein                                                                                                           |
|                                                                                                             |                              | TevJSym_ae00680                         | Rifp1Sym_gl00080                                           | Rifp2Sym_fc00080                          | Uncharacterized protein involved in oxidation of intracellular sulfur                                                          |
|                                                                                                             |                              | TevJSym_ae00690                         | n.a.                                                       | n.a.                                      | Adenylate cyclase                                                                                                              |
|                                                                                                             |                              | TevJSym_ae00700                         | n.a.                                                       | Rifp2Sym_cv00010                          | Cyclic nucleotide binding protein                                                                                              |
|                                                                                                             |                              | TevJSym_ae00710                         | Rifp1Sym_ew00090                                           | Rifp2Sym_cv00020                          | Hypothetical protein                                                                                                           |
|                                                                                                             |                              | TevJSym_ae00720                         | Rifp1Sym_ew00080                                           | Rifp2Sym_cv00030                          | Glyoxylase, beta-lactamase superfamily II                                                                                      |
|                                                                                                             |                              | TevJSym_ae00730                         | Rifp1Sym_ew00070;<br>Rifp1Sym_ew00060;<br>Rifp1Sym_ew00050 | Rifp2Sym_cv00040                          | NADPH-dependent glutamate synthase beta chain                                                                                  |
|                                                                                                             |                              | TevJSym_ae00740                         | Rifp1Sym_ew00040                                           | Rifp2Sym_cv00050                          | Pyridine nucleotide-disulphide oxidoreductase                                                                                  |
|                                                                                                             |                              | TevJSym_ae00750                         | Rifp1Sym_ew00030                                           | Rifp2Sym_cv00060                          | Hypothetical protein                                                                                                           |
|                                                                                                             |                              | TevJSym_ae00760                         | Rifp1Sym_ew00020                                           | Rifp2Sym_cv00070;<br>Rifp2Sym_cv00080     | Hydroxylamine dehydrogenase                                                                                                    |
|                                                                                                             |                              | n.a.                                    | Rifp1Sym_ew00010                                           | n.a.                                      | Hypothetical protein                                                                                                           |
|                                                                                                             |                              | n.a.                                    | n.a.                                                       | Rifp2Sym_cv00090                          | Hypothetical protein                                                                                                           |
|                                                                                                             |                              | TevJSym_ae00770                         | n.a.                                                       | Rifp2Sym_cv00100                          | Hypothetical protein                                                                                                           |
|                                                                                                             |                              | TevJSym_ae00780                         | n.a.                                                       | n.a.                                      | Hypothetical protein                                                                                                           |
|                                                                                                             |                              | TevJSym_ae00790                         | Rifp1Sym_bf00360                                           | Rifp2Sym_cv00110                          | D-alanyl-lipoteichoic acid acyltransferase DltB, MBOAT superfamily                                                             |
|                                                                                                             |                              | TevJSym_ae00800                         | Rifp1Sym_bf00350                                           | Rifp2Sym_cv00120                          | Hypothetical protein                                                                                                           |
|                                                                                                             |                              | TevJSym_ae00810                         | Rifp1Sym_bf00340                                           | Rifp2Sym_cv00130                          | DNA-binding transcriptional response regulator, NtrC family, contains REC, AAA-type ATPase, and a Fis-type DNA-binding domains |
|                                                                                                             |                              | TevJSym_ae00820                         | Rifp1Sym_bf00330                                           | Rifp2Sym_cv00140                          | Signal transduction histidine kinase                                                                                           |
|                                                                                                             |                              | TevJSym_ae00830                         | Rifp1Sym_bf00320                                           | Rifp2Sym_cv00150                          | ParE-like toxin of type II toxin-antitoxin system                                                                              |
|                                                                                                             |                              | TevJSym_ae00840                         | n.a.                                                       | Rifp2Sym_cv00160                          | ParD-like antitoxin of type II toxin-antitoxin system                                                                          |
|                                                                                                             |                              | TevJSym_ae00850                         | Rifp1Sym_bf00310                                           | Rifp2Sym_cv00170                          | Cytochrome b                                                                                                                   |
|                                                                                                             |                              | TevJSym_ae00860                         | Rifp1Sym_bf00300                                           | Rifp2Sym_cv00180                          | Protein of unknown function (DUF1924)                                                                                          |
|                                                                                                             |                              | TevJSym_ae00870                         | Rifp1Sym_bf00290                                           | Rifp2Sym_cv00190                          | Dihaem cytochrome c                                                                                                            |

[Back to list of tables](#)

**Table S2 Accessory genome exclusive to the East Pacific Rise symbionts (*Tevnia*, *Riftia 1*, and *Riftia 2* symbiont genome assemblies).** Total size = 141 335 bp; n.a. = Not Annotated; presence of sequence or part of sequence but no genes were called. **(Continued)**

| Exclusive sequence<br>Reference contig<br>Sequence length<br>Start - End positions<br>(in reference contig) | Low flanking<br>conservation | Locus-tag in <i>Tevnia</i><br>symbionts | Locus-tag in <i>Riftia 1</i><br>symbionts                  | Locus-tag in <i>Riftia 2</i><br>symbionts                                                            | Product                                                       |
|-------------------------------------------------------------------------------------------------------------|------------------------------|-----------------------------------------|------------------------------------------------------------|------------------------------------------------------------------------------------------------------|---------------------------------------------------------------|
|                                                                                                             |                              | TevJSym_ae00880                         | Rifp1Sym_bf00280                                           | Rifp2Sym_bo00320                                                                                     | His Kinase A (phospho-acceptor)<br>domain-containing protein  |
|                                                                                                             |                              | TevJSym_ae00890                         | Rifp1Sym_bf00270                                           | Rifp2Sym_bo00310                                                                                     | Two-component system, NtrC family,<br>response regulator AtoC |
|                                                                                                             |                              | TevJSym_ae00900                         | Rifp1Sym_bf00260                                           | Rifp2Sym_bo00300                                                                                     | Hypothetical protein                                          |
|                                                                                                             |                              | TevJSym_ae00910                         | Rifp1Sym_bf00250                                           | Rifp2Sym_bo00290                                                                                     | Major Facilitator Superfamily protein                         |
|                                                                                                             |                              | TevJSym_ae00920                         | n.a.                                                       | Rifp2Sym_bo00280                                                                                     | Cytochrome C'                                                 |
|                                                                                                             |                              | TevJSym_ae00930                         | Rifp1Sym_bf00240                                           | Rifp2Sym_bo00270                                                                                     | Glyceraldehyde-3-phosphate<br>dehydrogenase 3                 |
| Exclusive sequence 2<br>AFZB01000004<br>24661<br>114255 - 138916                                            | ✓                            | TevJSym_ad01110                         | Rifp1Sym_dc00020                                           | n.a.                                                                                                 |                                                               |
|                                                                                                             |                              | TevJSym_ad01120                         | Rifp1Sym_cn00190                                           | Rifp2Sym_az00350;<br>Rifp2Sym_az00340;<br>Rifp2Sym_az00330;<br>Rifp2Sym_az00320;<br>Rifp2Sym_az00310 | ATP-dependent helicase HrpA                                   |
|                                                                                                             |                              | TevJSym_ad01130                         | Rifp1Sym_cn00180                                           | Rifp2Sym_az00300                                                                                     | SEC-C motif-containing protein                                |
|                                                                                                             |                              | TevJSym_ad01140                         | Rifp1Sym_cn00170                                           | Rifp2Sym_az00290                                                                                     | Protein of unknown function<br>(DUF4124)                      |
|                                                                                                             |                              | TevJSym_ad01150                         | Rifp1Sym_cn00160                                           | Rifp2Sym_az00280                                                                                     | Glycosyltransferase involved in cell<br>wall bisynthesis      |
|                                                                                                             |                              | TevJSym_ad01160                         | Rifp1Sym_cn00150                                           | Rifp2Sym_az00270                                                                                     | PilZ domain-containing protein                                |
|                                                                                                             |                              | TevJSym_ad01170                         | Rifp1Sym_cn00140                                           | Rifp2Sym_az00260                                                                                     | Protein of unknown function<br>(DUF1631)                      |
|                                                                                                             |                              | TevJSym_ad01180                         | Rifp1Sym_cn00130                                           | Rifp2Sym_az00250                                                                                     | Hypothetical protein                                          |
|                                                                                                             |                              | TevJSym_ad01190                         | Rifp1Sym_cn00120                                           | Rifp2Sym_az00240                                                                                     | HD-like signal output (HDOD) domain,<br>no enzymatic activity |
|                                                                                                             |                              | TevJSym_ad01200                         | Rifp1Sym_cn00110                                           | Rifp2Sym_az00230                                                                                     | Sulfate adenylyltransferase                                   |
|                                                                                                             |                              | TevJSym_ad01210                         | Rifp1Sym_cn00100                                           | Rifp2Sym_az00220                                                                                     | Aconitase                                                     |
|                                                                                                             |                              | TevJSym_ad01220                         | Rifp1Sym_cn00090                                           | Rifp2Sym_az00210                                                                                     | Hypothetical protein                                          |
|                                                                                                             |                              | TevJSym_ad01230                         | Rifp1Sym_cn00080                                           | Rifp2Sym_az00180;<br>Rifp2Sym_az00190;<br>Rifp2Sym_az00200                                           | Short chain dehydrogenase reductase<br>Sdr                    |
|                                                                                                             |                              | n.a.                                    | Rifp1Sym_cn00070                                           | Rifp2Sym_az00170                                                                                     | Integral membrane protein                                     |
|                                                                                                             |                              | n.a.                                    | Rifp1Sym_cn00060                                           | Rifp2Sym_az00160                                                                                     | Integral membrane protein                                     |
|                                                                                                             |                              | TevJSym_ad01240                         | Rifp1Sym_cn00050                                           | Rifp2Sym_az00150                                                                                     | Putative membrane protein                                     |
| Exclusive sequence 3<br>AFZB01000005<br>22442<br>0 - 22442                                                  |                              | TevJSym_ae00010                         | Rifp1Sym_el00010                                           | Rifp2Sym_et00150                                                                                     | Proteic killer suppression protein                            |
|                                                                                                             |                              | TevJSym_ae00020                         | Rifp1Sym_el00020                                           | Rifp2Sym_et00140                                                                                     | Addiction module antidote protein,<br>HigA family             |
|                                                                                                             |                              | TevJSym_ae00030                         | Rifp1Sym_el00030;<br>Rifp1Sym_el00040;<br>Rifp1Sym_el00050 | Rifp2Sym_et00130;<br>Rifp2Sym_et00120                                                                | Toprim domain-containing protein                              |
|                                                                                                             |                              | TevJSym_ae00040                         | Rifp1Sym_el00060                                           | Rifp2Sym_et00110                                                                                     | Hypothetical protein                                          |
|                                                                                                             |                              | n.a.                                    | Rifp1Sym_el00070                                           | Rifp2Sym_et00100                                                                                     | Spermidine synthase                                           |
|                                                                                                             |                              | TevJSym_ae00050                         | Rifp1Sym_el00080                                           | Rifp2Sym_et00090                                                                                     | Phage integrase family protein                                |

[Back to list of tables](#)

**Table S2 Accessory genome exclusive to the East Pacific Rise symbionts (*Tevnia*, *Rifita 1*, and *Rifita 2* symbiont genome assemblies).** Total size = 141 335 bp; n.a. = Not Annotated; presence of sequence or part of sequence but no genes were called. **(Continued)**

| Exclusive sequence<br>Reference contig<br>Sequence length<br>Start - End positions<br>(in reference contig) | Low flanking<br>conservation | Locus-tag in <i>Tevnia</i><br>symbionts | Locus-tag in <i>Rifita 1</i><br>symbionts                  | Locus-tag in <i>Rifita 2</i><br>symbionts                                       | Product                              |
|-------------------------------------------------------------------------------------------------------------|------------------------------|-----------------------------------------|------------------------------------------------------------|---------------------------------------------------------------------------------|--------------------------------------|
|                                                                                                             |                              | TevJSym_ae00060                         | Rifp1Sym_el00090                                           | Rifp2Sym_et00080                                                                | Hypothetical protein                 |
|                                                                                                             |                              | TevJSym_ae00070                         | Rifp1Sym_el00100                                           | Rifp2Sym_et00070                                                                | Hypothetical protein                 |
|                                                                                                             |                              | TevJSym_ae00080;<br>TevJSym_ae00090     | Rifp1Sym_el00110                                           | Rifp2Sym_et00060                                                                | Virulence-associated protein I       |
|                                                                                                             |                              | TevJSym_ae00100                         | Rifp1Sym_el00120                                           | Rifp2Sym_et00050                                                                | Hypothetical protein                 |
|                                                                                                             |                              | TevJSym_ae00110                         | Rifp1Sym_el00130                                           | Rifp2Sym_et00040                                                                | Bacteriophage phi gp55-like protein  |
|                                                                                                             |                              | TevJSym_ae00120                         | Rifp1Sym_el00140                                           | Rifp2Sym_et00030                                                                | Hypothetical protein                 |
|                                                                                                             |                              | TevJSym_ae00130                         | Rifp1Sym_el00150                                           | Rifp2Sym_et00020                                                                | Hypothetical protein                 |
|                                                                                                             |                              | TevJSym_ae00140                         | Rifp1Sym_el00160                                           | Rifp2Sym_et00010                                                                | Hypothetical protein                 |
|                                                                                                             |                              | TevJSym_ae00150                         | Rifp1Sym_dx00010                                           | n.a.                                                                            | Hypothetical protein                 |
|                                                                                                             |                              | TevJSym_ae00160                         | Rifp1Sym_dx00020                                           | Rifp2Sym_ee00010                                                                | Hypothetical protein                 |
|                                                                                                             |                              | TevJSym_ae00170                         | Rifp1Sym_dx00030                                           | n.a.                                                                            | Hypothetical protein                 |
|                                                                                                             |                              | TevJSym_ae00180                         | Rifp1Sym_dx00040;<br>Rifp1Sym_dx00050;<br>Rifp1Sym_dx00060 | Rifp2Sym_ee00020;<br>Rifp2Sym_ee00030                                           | Hypothetical protein                 |
|                                                                                                             |                              | TevJSym_ae00190                         | Rifp1Sym_dx00070                                           | Rifp2Sym_ee00040                                                                | Hypothetical protein                 |
|                                                                                                             |                              | TevJSym_ae00200                         | Rifp1Sym_dx00080;<br>Rifp1Sym_dx00090;<br>Rifp1Sym_dx00100 | Rifp2Sym_ee00050;<br>Rifp2Sym_ee00060;<br>Rifp2Sym_ee00070                      | Phage tape measure protein           |
|                                                                                                             |                              | n.a.                                    | n.a.                                                       | Rifp2Sym_ee00080                                                                | Hypothetical protein                 |
|                                                                                                             |                              | n.a.                                    | Rifp1Sym_dx00110                                           | n.a.                                                                            | Hypothetical protein                 |
|                                                                                                             |                              | TevJSym_ae00210                         | Rifp1Sym_dx00120                                           | Rifp2Sym_ee00090                                                                | Hypothetical protein                 |
|                                                                                                             |                              | TevJSym_ae00220                         | Rifp1Sym_dx00130                                           | Rifp2Sym_ee00100                                                                | Hypothetical protein                 |
|                                                                                                             |                              | TevJSym_ae00230                         | Rifp1Sym_dx00140                                           | Rifp2Sym_ee00110                                                                | Hypothetical protein                 |
| Exclusive sequence 4<br>AFZB01000004<br>9533<br>17066 - 26599                                               | ✓                            | TevJSym_ad00160                         | Rifp1Sym_co00130                                           | Rifp2Sym_cu00010                                                                | Hypothetical protein                 |
|                                                                                                             |                              | TevJSym_ad00170                         | Rifp1Sym_co00140                                           | Rifp2Sym_fm00020                                                                | Protein of unknown function (DUF323) |
|                                                                                                             |                              | TevJSym_ad00180                         | Rifp1Sym_co00150;<br>Rifp1Sym_co00160                      | Rifp2Sym_fm00010                                                                | Sulfatase-modifying factor enzyme 1  |
|                                                                                                             |                              | TevJSym_ad00190                         | Rifp1Sym_co00160                                           | n.a.                                                                            | Hypothetical protein                 |
|                                                                                                             |                              | TevJSym_ad00200                         | Rifp1Sym_co00170                                           | Rifp2Sym_fu00090;<br>Rifp2Sym_fu00080                                           | Protein phosphatase                  |
|                                                                                                             |                              | TevJSym_ad00210                         | Rifp1Sym_co00180                                           | Rifp2Sym_fu00070                                                                | Protein phosphatase ImpM             |
| Exclusive sequence 5<br>AFZB01000008<br>7596<br>63197 - 70793                                               |                              | n.a.                                    | Rifp1Sym_ev00020                                           | n.a.                                                                            | Aspartate aminotransferase           |
|                                                                                                             |                              | TevJSym_ah00640                         | Rifp1Sym_ev00030                                           | Rifp2Sym_ii00010                                                                | N-6 DNA Methylase                    |
|                                                                                                             |                              | TevJSym_ah00650                         | Rifp1Sym_ev00040                                           | Rifp2Sym_ii00020;<br>Rifp2Sym_ii00030;<br>Rifp2Sym_mm00020;<br>Rifp2Sym_mm00010 | Type I restriction enzyme M protein  |
|                                                                                                             |                              | TevJSym_ah00660                         | Rifp1Sym_ev00050                                           | n.a.                                                                            | DEAD/DEAH box helicase               |



[Back to list of tables](#)

**Table S2 Accessory genome exclusive to the East Pacific Rise symbionts (*Tevnia*, *Rifita 1*, and *Rifita 2* symbiont genome assemblies).** Total size = 141 335 bp; n.a. = Not Annotated; presence of sequence or part of sequence but no genes were called. **(Continued)**

| Exclusive sequence<br>Reference contig<br>Sequence length<br>Start - End positions<br>(in reference contig) | Low flanking<br>conservation | Locus-tag in <i>Tevnia</i><br>symbionts | Locus-tag in <i>Rifita 1</i><br>symbionts | Locus-tag in <i>Rifita 2</i><br>symbionts | Product                                                 |
|-------------------------------------------------------------------------------------------------------------|------------------------------|-----------------------------------------|-------------------------------------------|-------------------------------------------|---------------------------------------------------------|
| Exclusive sequence 6<br>AFZB01000004<br>7306<br>0 - 7306                                                    | ✓                            | TevJSym_ad00010                         | Rifp1Sym_ez00030                          | Rifp2Sym_cu00190                          | Putative glycosyltransferase                            |
|                                                                                                             |                              | TevJSym_ad00020                         | Rifp1Sym_ez00020                          | Rifp2Sym_cu00180                          | Asparagine synthase (glutamine-hydrolysing)             |
|                                                                                                             |                              | TevJSym_ad00030                         | Rifp1Sym_ez00010                          | Rifp2Sym_cu00170                          | Putative glycosyltransferase                            |
|                                                                                                             |                              | TevJSym_ad00040                         | n.a.                                      | Rifp2Sym_cu00160                          | Glycosyltransferase, family 2                           |
| Exclusive sequence 7<br>AFZB01000038<br>6555<br>2424 - 8979                                                 | ✓                            | TevJSym_bl00040                         | Rifp1Sym_ep00040                          | Rifp2Sym_gt00010                          | CRISPR-associated protein Cas7/Csd2, subtype I-C/DVULG  |
|                                                                                                             |                              | TevJSym_bl00050                         | Rifp1Sym_ep00050                          | Rifp2Sym_gt00020                          | CRISPR-associated protein Csd1                          |
|                                                                                                             |                              | TevJSym_bl00060                         | Rifp1Sym_ep00060                          | Rifp2Sym_gt00030                          | CRISPR-associated protein Cas5d                         |
|                                                                                                             |                              | TevJSym_bl00070                         | Rifp1Sym_ep00070                          | Rifp2Sym_gt00040                          | CRISPR-associated endonuclease/helicase Cas3            |
| Exclusive sequence 8<br>AFZB01000002<br>5745<br>158129 - 163874                                             | ✓                            | TevJSym_ab01580;<br>TevJSym_ab01590     | Rifp1Sym_bb00150                          | Rifp2Sym_ga00040                          | Putative transmembrane protein                          |
|                                                                                                             |                              | TevJSym_ab01600                         | Rifp1Sym_bb00140                          | Rifp2Sym_dh00160                          | Endoglucanase A                                         |
|                                                                                                             |                              | TevJSym_ab01610                         | Rifp1Sym_bb00130                          | Rifp2Sym_dh00150                          | Putative transcriptional regulator                      |
|                                                                                                             |                              | n.a.                                    | n.a.                                      | Rifp2Sym_dh00140                          | Hypothetical protein                                    |
|                                                                                                             |                              | TevJSym_ab01620                         | Rifp1Sym_bb00120                          | Rifp2Sym_dh00130                          | Hypothetical protein                                    |
|                                                                                                             |                              | TevJSym_ab01630                         | Rifp1Sym_bb00110                          | Rifp2Sym_dh00120                          | Transposase insF for insertion sequence IS3             |
|                                                                                                             |                              | TevJSym_ab01640                         | Rifp1Sym_bb00100                          | Rifp2Sym_dh00110                          | Integrase catalytic region                              |
| Exclusive sequence 9<br>AFZB01000037<br>3882<br>17256 - 21138                                               | ✓                            | TevJSym_bk00210                         | Rifp1Sym_cv00080                          | Rifp2Sym_bj00120                          | Adenosylhomocysteinase                                  |
|                                                                                                             |                              | n.a.                                    | n.a.                                      | Rifp2Sym_bj00110                          | Hypothetical protein                                    |
|                                                                                                             |                              | TevJSym_bk00220                         | Rifp1Sym_cv00090                          | Rifp2Sym_bj00100                          | Cobalt-zinc-cadmium efflux system protein               |
| Exclusive sequence 10<br>AFZB01000045<br>3514<br>12768 - 16282                                              | ✓                            | TevJSym_bs00140                         | Rifp1Sym_gd00030                          | Rifp2Sym_da00120                          | Lipopolysaccharide transport system permease protein    |
|                                                                                                             |                              | TevJSym_bs00150                         | Rifp1Sym_gd00020                          | Rifp2Sym_da00130                          | Lipopolysaccharide transport system ATP-binding protein |
| Exclusive sequence 11<br>AFZB01000064<br>2784<br>0 - 2784                                                   |                              | TevJSym_cl00010                         | n.a.                                      | Rifp2Sym_bz00010                          | Sodium/proton antiporter, NhaA family                   |
|                                                                                                             |                              | TevJSym_cl00020                         | Rifp1Sym_gw00010                          | Rifp2Sym_bz00020                          | Hypothetical protein                                    |
| Exclusive sequence 12<br>AFZB01000018<br>2422<br>32751 - 35173                                              |                              | TevJSym_ar00310                         | Rifp1Sym_bh00100                          | n.a.                                      | Hypothetical protein                                    |
|                                                                                                             |                              | TevJSym_ar00320                         | n.a.                                      | Rifp2Sym_ab00280                          | Hypothetical protein                                    |
| Exclusive sequence 13<br>AFZB01000005<br>1918<br>119131 - 121049                                            |                              | TevJSym_ae01170                         | Rifp1Sym_bf00030                          | Rifp2Sym_bo00030                          | Hypothetical protein                                    |
| Exclusive sequence 13<br>AFZB01000005<br>1918<br>119131 - 121049                                            |                              | TevJSym_ae01180;<br>TevJSym_ae01190     | Rifp1Sym_bf00020                          | Rifp2Sym_bo00020                          | Cytochrome C, class I                                   |

[Back to list of tables](#)

**Table S2 Accessory genome exclusive to the East Pacific Rise symbionts (*Tevnia*, *Riftia 1*, and *Riftia 2* symbiont genome assemblies).** Total size = 141 335 bp; n.a. = Not Annotated; presence of sequence or part of sequence but no genes were called. **(Continued)**

| Exclusive sequence<br>Reference contig<br>Sequence length<br>Start - End positions<br>(in reference contig) | Low flanking<br>conservation | Locus-tag in <i>Tevnia</i><br>symbionts               | Locus-tag in <i>Riftia 1</i><br>symbionts                | Locus-tag in <i>Riftia 2</i><br>symbionts                | Product                                                                                                        |
|-------------------------------------------------------------------------------------------------------------|------------------------------|-------------------------------------------------------|----------------------------------------------------------|----------------------------------------------------------|----------------------------------------------------------------------------------------------------------------|
| Exclusive sequence 14<br>AFZB01000005<br>1748<br>63277 - 65025                                              |                              | TevJSym_ae00560                                       | Rifp1Sym_dq00090                                         | Rifp2Sym_ep00040                                         | Transcriptional regulatory protein<br>ZraR                                                                     |
| Exclusive sequence 15<br>AFZB01000077<br>1739<br>0 - 1739                                                   |                              | TevJSym_cx00010                                       | Rifp1Sym_db00080                                         | Rifp2Sym_jp00010                                         | Transposase                                                                                                    |
| Exclusive sequence 16<br>AFZB01000033<br>1378<br>27912 - 29290                                              |                              | TevJSym_bg00220<br>TevJSym_bg00230<br>TevJSym_bg00240 | Rifp1Sym_bk00090<br>Rifp1Sym_bk00080<br>Rifp1Sym_bk00070 | Rifp2Sym_bh00120<br>Rifp2Sym_bh00110<br>Rifp2Sym_bh00100 | KAP P-loop domain containing protein<br>KAP family P-loop domain-containing<br>protein<br>Hypothetical protein |
| Exclusive sequence 17<br>AFZB01000037<br>1027<br>10832 - 11859                                              | ✓                            | TevJSym_bk00130                                       | Rifp1Sym_cv00020                                         | Rifp2Sym_bj00190                                         | Integrase core domain-containing<br>protein                                                                    |
| Exclusive sequence 18<br>AFZB01000016<br>984<br>79511 - 80495                                               |                              | TevJSym_ap00810                                       | Rifp1Sym_fn00070                                         | Rifp2Sym_fv00020                                         | Putative transposase                                                                                           |
| Exclusive sequence 19<br>AFZB01000029<br>392<br>3174 - 3566                                                 |                              | TevJSym_bc00050                                       | Rifp1Sym_al00320                                         | Rifp2Sym_aw00250                                         | Transposase DDE domain-containing<br>protein                                                                   |

[Back to list of tables](#)

**Table S3 Accessory genome found in *Riftia* symbionts (*Riftia 1* and *Riftia 2* symbiont genome assemblies).** Total size = 77 303 bp; n.a. = Not Annotated; presence of sequence or part of sequence but no genes were called; n.d. = Not Detected; sequence absent from the assembly. **(Continued)**

| Exclusive sequence   | Reference contig | Sequence length | Start - End (in reference contig) | Locus-tag in <i>Riftia 1</i> symbionts | Locus-tag in <i>Riftia 2</i> symbionts | Product                                                                   |                  |                  |                               |
|----------------------|------------------|-----------------|-----------------------------------|----------------------------------------|----------------------------------------|---------------------------------------------------------------------------|------------------|------------------|-------------------------------|
| Exclusive sequence 1 | AFOC01000021     | 39573           | 0 - 39573                         | Rifp1Sym_au00010                       | Rifp2Sym_gm00020                       | Type II restriction/modification system, DNA methylase subunit YeeA       |                  |                  |                               |
|                      |                  |                 |                                   | Rifp1Sym_au00020                       | Rifp2Sym_gm00010                       | Protein of unknown function (DUF4263)                                     |                  |                  |                               |
|                      |                  |                 |                                   | Rifp1Sym_au00030                       | Rifp2Sym_hf00010                       | TIGR02687 family protein                                                  |                  |                  |                               |
|                      |                  |                 |                                   | Rifp1Sym_au00040                       | Rifp2Sym_hf00020                       | Transposase IS200 like                                                    |                  |                  |                               |
|                      |                  |                 |                                   | Rifp1Sym_au00050                       | n.a.                                   | Transposase IS200 like                                                    |                  |                  |                               |
|                      |                  |                 |                                   | Rifp1Sym_au00060                       | Rifp2Sym_hf00030;<br>Rifp2Sym_hv00040  | ATP-dependent Lon protease                                                |                  |                  |                               |
|                      |                  |                 |                                   | Rifp1Sym_au00070                       | Rifp2Sym_hv00020                       | Hypothetical protein                                                      |                  |                  |                               |
|                      |                  |                 |                                   | Rifp1Sym_au00080                       | n.a.                                   | Uncharacterized protein YydD, contains DUF2326 domain                     |                  |                  |                               |
|                      |                  |                 |                                   | Rifp1Sym_au00090                       | n.a.                                   | HicB family protein                                                       |                  |                  |                               |
|                      |                  |                 |                                   | Rifp1Sym_au00100                       | n.a.                                   | Hypothetical protein                                                      |                  |                  |                               |
|                      |                  |                 |                                   | Rifp1Sym_au00110                       | n.a.                                   | Conjugal transfer mating pair stabilization protein TraG                  |                  |                  |                               |
|                      |                  |                 |                                   | Rifp1Sym_au00120                       | n.a.                                   | Conjugative transfer pilus assembly protein TraH                          |                  |                  |                               |
|                      |                  |                 |                                   | Rifp1Sym_au00130                       | n.a.                                   | Conjugal transfer pilus assembly protein TraF                             |                  |                  |                               |
|                      |                  |                 |                                   | Rifp1Sym_au00140                       | n.a.                                   | Type-F conjugative transfer system mating-pair stabilization protein TraN |                  |                  |                               |
|                      |                  |                 |                                   | Rifp1Sym_au00150                       | n.a.                                   | Conjugal transfer pilus assembly protein TrbC                             |                  |                  |                               |
|                      |                  |                 |                                   | Rifp1Sym_au00160                       | n.a.                                   | Conjugal transfer pilus assembly protein TraU                             |                  |                  |                               |
|                      |                  |                 |                                   | Rifp1Sym_au00170                       | n.a.                                   | Patatin-like phospholipase                                                |                  |                  |                               |
|                      |                  |                 |                                   | Rifp1Sym_au00180                       | n.a.                                   | Conjugal transfer pilin signal peptidase Trbl                             |                  |                  |                               |
|                      |                  |                 |                                   | Rifp1Sym_au00190                       | n.a.                                   | Type-F conjugative transfer system protein (Trbl_Ftype)                   |                  |                  |                               |
|                      |                  |                 |                                   | Rifp1Sym_au00200                       | n.a.                                   | Conjugal transfer ATP-binding protein TraC                                |                  |                  |                               |
|                      |                  |                 |                                   | Rifp1Sym_au00210                       | n.a.                                   | Type IV conjugative transfer system lipoprotein TraV                      |                  |                  |                               |
|                      |                  |                 |                                   | Rifp1Sym_au00220                       | n.a.                                   | Thiol:disulfide interchange protein DsbC                                  |                  |                  |                               |
|                      |                  |                 |                                   | Rifp1Sym_au00230                       | n.a.                                   | Conjugal transfer pilus assembly protein TraB                             |                  |                  |                               |
|                      |                  |                 |                                   | Rifp1Sym_au00240                       | n.a.                                   | Conjugal transfer pilus assembly protein TraK                             |                  |                  |                               |
|                      |                  |                 |                                   | Rifp1Sym_au00250                       | n.a.                                   | Conjugal transfer pilus assembly protein TraE                             |                  |                  |                               |
|                      |                  |                 |                                   | Rifp1Sym_au00260                       | Rifp2Sym_ew00060                       | Conjugal transfer pilus assembly protein TraA                             |                  |                  |                               |
|                      |                  |                 |                                   | Rifp1Sym_au00270                       | Rifp2Sym_ew00050                       | Outer membrane protein OmpA                                               |                  |                  |                               |
|                      |                  |                 |                                   | AFOC01000086                           | 15845                                  | 0 - 15845                                                                 | Rifp1Sym_dg00010 | Rifp2Sym_ew00020 | ABC-2 type transporter        |
|                      |                  |                 |                                   |                                        |                                        |                                                                           | Rifp1Sym_dg00020 | Rifp2Sym_ew00010 | Hypothetical protein          |
|                      |                  |                 |                                   |                                        |                                        |                                                                           | Rifp1Sym_dg00030 | Rifp2Sym_kv00030 | Putative cysteine desulfurase |
|                      |                  |                 |                                   |                                        |                                        |                                                                           | Rifp1Sym_dg00040 | Rifp2Sym_kv00020 | Hypothetical protein          |

[Back to list of tables](#)

**Table S3 Accessory genome found in *Riftia* symbionts (*Riftia 1* and *Riftia 2* symbiont genome assemblies).** Total size = 77 303 bp; n.a. = Not Annotated; presence of sequence or part of sequence but no genes were called; n.d. = Not Detected; sequence absent from the assembly. **(Continued)**

| Exclusive sequence   | Reference contig | Sequence length | Start - End (in reference contig) | Locus-tag in <i>Riftia 1</i> symbionts | Locus-tag in <i>Riftia 2</i> symbionts | Product                                                   |
|----------------------|------------------|-----------------|-----------------------------------|----------------------------------------|----------------------------------------|-----------------------------------------------------------|
|                      |                  |                 |                                   | Rifp1Sym_dg00050                       | Rifp2Sym_kv00010                       | Hypothetical protein                                      |
|                      |                  |                 |                                   | Rifp1Sym_dg00060                       | Rifp2Sym_kj00010                       | Hypothetical protein                                      |
|                      |                  |                 |                                   | Rifp1Sym_dg00070                       | Rifp2Sym_kj00020                       | Hypothetical protein                                      |
|                      |                  |                 |                                   | Rifp1Sym_dg00080                       | n.d.                                   | Hypothetical protein                                      |
|                      |                  |                 |                                   | Rifp1Sym_dg00090                       | n.a.                                   | Ribosomal large subunit pseudouridine synthase C          |
|                      |                  |                 |                                   | Rifp1Sym_dg00100                       | Rifp2Sym_lw00010                       | Hypothetical protein                                      |
|                      |                  |                 |                                   | Rifp1Sym_dg00110                       | n.a.                                   | Hypothetical protein                                      |
|                      |                  |                 |                                   | Rifp1Sym_dg00120                       | Rifp2Sym_me00010                       | Hypothetical protein                                      |
|                      |                  |                 |                                   | Rifp1Sym_dg00130                       | n.a.                                   | Putative plasmid stabilization system protein             |
|                      |                  |                 |                                   | Rifp1Sym_dg00140                       | n.d.                                   | Hypothetical protein                                      |
|                      |                  |                 |                                   | Rifp1Sym_dg00150                       | n.d.                                   | Hypothetical protein                                      |
|                      |                  |                 |                                   | Rifp1Sym_dg00160                       | n.a.                                   | Hypothetical protein                                      |
|                      | AFOC010000153    | 5054            | 0 - 5054                          | Rifp1Sym_fv00010                       | Rifp2Sym_ja00010                       | Hypothetical protein                                      |
|                      |                  |                 |                                   | Rifp1Sym_fv00020                       | Rifp2Sym_ja00020                       | Hypothetical protein                                      |
|                      |                  |                 |                                   | Rifp1Sym_fv00030                       | Rifp2Sym_kh00010                       | Hypothetical protein                                      |
|                      |                  |                 |                                   | Rifp1Sym_fv00040                       | n.a.                                   | YbaK/prolyl-tRNA synthetase associated region             |
| Exclusive sequence 2 | AFOC010000112    | 9453            | 0 - 9453                          | Rifp1Sym_eg00010                       | Rifp2Sym_jz00010                       | CRISPR-associated protein Cas1                            |
|                      |                  |                 |                                   | Rifp1Sym_eg00020                       | n.a.                                   | CRISPR system Cascade subunit CasE                        |
|                      |                  |                 |                                   | Rifp1Sym_eg00030                       | n.a.                                   | CRISPR system Cascade subunit CasD                        |
|                      |                  |                 |                                   | Rifp1Sym_eg00040                       | Rifp2Sym_hp00010                       | CRISPR system Cascade subunit CasC                        |
|                      |                  |                 |                                   | Rifp1Sym_eg00050                       | Rifp2Sym_hp00030                       | CRISPR system Cascade subunit CasA                        |
|                      |                  |                 |                                   | Rifp1Sym_eg00060                       | Rifp2Sym_mb00010                       | CRISPR-associated endonuclease/helicase Cas3              |
| Exclusive sequence 3 | AFOC010000148    | 5239            | 0 - 5239                          | Rifp1Sym_fq00010                       | Rifp2Sym_fa00040                       | Protein of unknown function (DUF1788)                     |
|                      |                  |                 |                                   | Rifp1Sym_fq00020                       | Rifp2Sym_fa00030;<br>Rifp2Sym_fa00020  | Hypothetical protein                                      |
|                      |                  |                 |                                   | Rifp1Sym_fx00010                       | n.a.                                   | Transcriptional regulator, AlpA family                    |
|                      |                  |                 |                                   | Rifp1Sym_fx00020                       | n.a.                                   | Integrating conjugative element relaxase, PFL_4751 family |
|                      | contig00270      | 2139            | 0 - 2139                          | n.d.                                   | Rifp2Sym_iy00020                       | Conjugative coupling factor TraD, SXT/TOL                 |

[Back to list of tables](#)

**Table S4 Accessory genome found in 9°N symbionts (*Tevnia* and *Riftia 2* symbiont genome assemblies but not in *Riftia 1* symbionts).** Total size = 75 723 bp;n.a. = Not Annotated; presence of sequence or part of sequence but no genes were called. **(Continued)**

| Exclusive sequence   | Reference contig name | sequence length                                             | Start – End (in reference contig) | Low Flanking conservation | Locus-tag in <i>Tevnia</i> symbionts | Locus-tag in <i>Riftia 2</i> symbionts | Product                                                  |                 |   |                 |                  |                      |
|----------------------|-----------------------|-------------------------------------------------------------|-----------------------------------|---------------------------|--------------------------------------|----------------------------------------|----------------------------------------------------------|-----------------|---|-----------------|------------------|----------------------|
| Exclusive sequence 1 | AFZB01000005          | 16398                                                       | 22436 - 38834                     |                           | TevJSym_ae00240                      | Rifp2Sym_ee00120                       | Phage protein, HK97 gp10 family                          |                 |   |                 |                  |                      |
|                      |                       |                                                             |                                   |                           | TevJSym_ae00250                      | n.a.                                   | Hypothetical protein                                     |                 |   |                 |                  |                      |
|                      |                       |                                                             |                                   |                           | TevJSym_ae00260                      | n.a.                                   | Hypothetical protein                                     |                 |   |                 |                  |                      |
|                      |                       |                                                             |                                   |                           | TevJSym_ae00270                      | n.a.                                   | Hypothetical protein                                     |                 |   |                 |                  |                      |
|                      |                       |                                                             |                                   |                           | TevJSym_ae00280                      | n.a.                                   | Serine-rich adhesin-like protein for platelets precursor |                 |   |                 |                  |                      |
|                      |                       |                                                             |                                   |                           | TevJSym_ae00290                      | Rifp2Sym_er00020                       | Hypothetical protein                                     |                 |   |                 |                  |                      |
|                      |                       |                                                             |                                   |                           | TevJSym_ae00300                      | Rifp2Sym_er00030                       | Peptidase family M23                                     |                 |   |                 |                  |                      |
|                      |                       |                                                             |                                   |                           | TevJSym_ae00310                      | Rifp2Sym_er00040                       | Hypothetical protein                                     |                 |   |                 |                  |                      |
|                      |                       |                                                             |                                   |                           | TevJSym_ae00320                      | Rifp2Sym_er00050                       | Hypothetical protein                                     |                 |   |                 |                  |                      |
|                      |                       |                                                             |                                   |                           | TevJSym_ae00330                      | Rifp2Sym_er00060                       | Mu-like prophage I protein                               |                 |   |                 |                  |                      |
|                      |                       |                                                             |                                   |                           | TevJSym_ae00340                      | Rifp2Sym_er00080;<br>Rifp2Sym_er00070  | Antitoxin YefM                                           |                 |   |                 |                  |                      |
|                      |                       |                                                             |                                   |                           | TevJSym_ae00350                      | Rifp2Sym_er00090                       | Hypothetical protein                                     |                 |   |                 |                  |                      |
|                      |                       |                                                             |                                   |                           | TevJSym_ae00360                      | Rifp2Sym_er00110;<br>Rifp2Sym_er00100  | Hypothetical protein                                     |                 |   |                 |                  |                      |
|                      |                       |                                                             |                                   |                           | TevJSym_ae00370                      | Rifp2Sym_bw00170                       | Hypothetical protein                                     |                 |   |                 |                  |                      |
|                      |                       |                                                             |                                   |                           | TevJSym_ae00380                      | Rifp2Sym_bw00160                       | Hypothetical protein                                     |                 |   |                 |                  |                      |
|                      |                       |                                                             |                                   |                           | TevJSym_ae00390                      | Rifp2Sym_bw00150                       | Hypothetical protein                                     |                 |   |                 |                  |                      |
|                      |                       |                                                             |                                   |                           | TevJSym_ae00400                      | Rifp2Sym_bw00140                       | Hypothetical protein                                     |                 |   |                 |                  |                      |
|                      |                       |                                                             |                                   |                           | Exclusive sequence 2                 | AFZB01000002                           | 2860                                                     | 126914 - 129774 | ✓ | TevJSym_ab01270 | Rifp2Sym_bw00010 | Hypothetical protein |
|                      |                       |                                                             |                                   |                           |                                      |                                        |                                                          |                 |   | TevJSym_ab01280 | n.a.             | Hypothetical protein |
| TevJSym_ab01290      | n.a.                  | Vault protein inter-alpha-trypsin domain-containing protein |                                   |                           |                                      |                                        |                                                          |                 |   |                 |                  |                      |
| TevJSym_ab01300      | n.a.                  | Transposase InsO and inactivated derivatives                |                                   |                           |                                      |                                        |                                                          |                 |   |                 |                  |                      |
| Exclusive sequence 3 | AFZB01000050          | 9786                                                        | 0 - 9786                          |                           | TevJSym_bx00010                      | n.a.                                   | ATPase                                                   |                 |   |                 |                  |                      |

[Back to list of tables](#)

**Table S4 Accessory genome found in 9°N symbionts (*Tevnia* and *Riftia 2* symbiont genome assemblies but not in *Riftia 1* symbionts).** Total size = 75 723 bp;n.a. = Not Annotated; presence of sequence or part of sequence but no genes were called. **(Continued)**

|                       |              |      |                 |   |                 |                  |                                                                                          |
|-----------------------|--------------|------|-----------------|---|-----------------|------------------|------------------------------------------------------------------------------------------|
|                       |              |      |                 |   | TevJSym_bx00020 | n.a.             | Putative ATPase involved in DNA repair                                                   |
|                       |              |      |                 |   | TevJSym_bx00030 | n.a.             | Hypothetical protein                                                                     |
| Exclusive sequence 4  | AFZB01000057 | 6657 | 0 - 6657        |   | TevJSym_ce00010 | n.a.             | T/G mismatch-specific endonuclease                                                       |
|                       |              |      |                 |   | TevJSym_ce00020 | n.a.             | DNA (cytosine-5)-methyltransferase 1                                                     |
|                       |              |      |                 |   | TevJSym_ce00030 | n.a.             | KamA family protein                                                                      |
| Exclusive sequence 5  | AFZB01000036 | 6411 | 26656 - 33067   | ✓ | TevJSym_bj00220 | Rifp2Sym_ht00010 | Hemolysin-type calcium-binding repeat-containing protein                                 |
|                       |              |      |                 |   | TevJSym_bj00230 | Rifp2Sym_ag00010 | Hemolysin D                                                                              |
|                       |              |      |                 |   | TevJSym_bj00240 | Rifp2Sym_jc00010 | Leukotoxin translocation ATP-binding protein/toxin secretion ABC transporter ATP-binding |
| Exclusive sequence 6  | AFZB01000022 | 5730 | 0 - 5730        |   | TevJSym_av00010 | Rifp2Sym_he00010 | Integron integrase                                                                       |
| Exclusive sequence 7  | AFZB01000006 | 1847 | 18500 - 20347   | ✓ | TevJSym_af00170 | Rifp2Sym_de00140 | Membrane-bound lytic murein transglycosylase F                                           |
|                       |              |      |                 |   | TevJSym_af00180 | Rifp2Sym_de00150 | Phospholipase A1                                                                         |
|                       |              |      |                 |   | TevJSym_af00190 | Rifp2Sym_de00160 | tRNA(adenine34) deaminase                                                                |
|                       |              |      |                 |   | TevJSym_af00200 | n.a.             | GMP synthase (glutamine-hydrolysing)                                                     |
| Exclusive sequence 8  | AFZB01000083 | 1367 | 0 - 1367        |   | n.a.            | Rifp2Sym_km00020 | Group II intron, maturase-specific domain                                                |
|                       |              |      |                 |   | n.a.            | Rifp2Sym_km00020 | IS3 family transposase, orfB                                                             |
| Exclusive sequence 9  | AFZB01000002 | 5754 | 173150 - 178904 |   | TevJSym_ab01730 | Rifp2Sym_jq00010 | ATP-dependent RNA helicase RhIE                                                          |
|                       |              |      |                 |   | TevJSym_ab01740 | n.a.             | Iron complex outermembrane receptor protein                                              |
| Exclusive sequence 10 | AFZB01000045 | 3703 | 0 - 3703        |   | TevJSym_bs00010 | Rifp2Sym_da00010 | Integrase/recombinase XerD                                                               |
|                       |              |      |                 |   | TevJSym_bs00020 | Rifp2Sym_da00020 | Resolvase, N terminal domain                                                             |
| Exclusive sequence 11 | AFZB01000035 | 3521 | 1360 - 4881     |   | TevJSym_bi00030 | Rifp2Sym_hr00010 | Peptide methionine sulfoxide reductase msrA/msrB                                         |

[Back to list of tables](#)

**Table S4 Accessory genome found in 9°N symbionts (*Tevnia* and *Rifita 2* symbiont genome assemblies but not in *Riftia 1* symbionts).** Total size = 75 723 bp;n.a. = Not Annotated; presence of sequence or part of sequence but no genes were called. **(Continued)**

|                       |              |      |                 |   |                                    |                                                                    |                                                                                                                 |
|-----------------------|--------------|------|-----------------|---|------------------------------------|--------------------------------------------------------------------|-----------------------------------------------------------------------------------------------------------------|
|                       |              |      |                 |   | TevJSym_bi00040                    | Rifp2Sym_hr00020                                                   | Hypothetical protein                                                                                            |
|                       |              |      |                 |   | TevJSym_bi00050                    | Rifp2Sym_hr00030;<br>Rifp2Sym_fg00010                              | Ribonucleoside-triphosphate reductase class III catalytic subunit                                               |
| Exclusive sequence 12 | AFZB01000068 | 3381 | 0 - 3381        |   | TevJSym_cp00010                    | n.a.                                                               | Tertatricoptide TPR_2 repeat protein                                                                            |
| Exclusive sequence 13 | AFZB01000005 | 2120 | 79186 - 81306   |   | TevJSym_ae00700                    | Rifp2Sym_cv00010                                                   | MMPL family protein                                                                                             |
| Exclusive sequence 14 | AFZB01000079 | 1665 | 0 - 1665        |   | TevJSym_cz00010                    | Rifp2Sym_jr00010                                                   | Filamentation induced by cAMP protein Fic                                                                       |
| Exclusive sequence 15 | AFZB01000064 | 1541 | 0 - 1541        |   | TevJSym_cl00010                    | Rifp2Sym_ic00010                                                   | Sodium/proton antiporter, NhaA family                                                                           |
| Exclusive sequence 16 | AFZB01000064 | 1487 | 2936 - 4423     |   | TevJSym_cl00030<br>TevJSym_cl00040 | n.a.<br>Rifp2Sym_ko00010;<br>Rifp2Sym_ko00020;<br>Rifp2Sym_ko00030 | Ribosomal subunit interface protein<br>LysR family transcriptional regulator, transcriptional activator of nhaA |
| Exclusive sequence 17 | AFZB01000001 | 1211 | 135783 - 136993 | ✓ | TevJSym_aa01480<br>TevJSym_aa01490 | Rifp2Sym_bk00140<br>Rifp2Sym_bk00150                               | Nitrate/nitrite transport system substrate-binding protein<br>ANTAR domain-containing protein                   |
| Exclusive sequence 18 | AFZB01000016 | 284  | 12994 - 13278   |   | TevJSym_ap00160                    | Rifp2Sym_is00010                                                   | LTXQ motif family protein                                                                                       |

[Back to list of tables](#)

**Table S5 Genes of particular interest.** Modified or complemented from Gardebrecht *et al.* (1). n.d.: Not Detected; no sequences were found in this genome assembly; n.a.: Not Annotated; orthologous sequence was found but no genes were detected in this genome assembly. **(Continued)**

1. **Gardebrecht A, Markert S, Sievert SM, Felbeck H, Thürmer A, Albrecht D, Wollherr A, Kabisch J, Le Bris N, Lehmann R.** 2011. Physiological homogeneity among the endosymbionts of *Riftia pachyptila* and *Tevnia jerichonana* revealed by proteogenomics. ISME J 6:766–776.

|                      |                                  |                |                                                 | Locus-tag in Genbank accessions                |                            |                        |                          |                                      |                  |
|----------------------|----------------------------------|----------------|-------------------------------------------------|------------------------------------------------|----------------------------|------------------------|--------------------------|--------------------------------------|------------------|
| Categorie            | Sub-Categorie                    | Gene           | Function                                        | <i>Ridgeia</i> 1 symbionts                     | <i>Ridgeia</i> 2 Symbionts | <i>Tevnia</i> symbiont | <i>Riftia</i> 1 symbiont | <i>Riftia</i> 2 symbiont             |                  |
| 1. Sulfur metabolism |                                  | aprA           | Adenylylsulfate reductase, alpha subunit        | Ga0074115_10324                                | Ga0076813_14621            | TevJSym_ag00880        | Rifp1Sym_ej00110         | Rifp2Sym_bz00020 ; Rifp2Sym_bz00030  |                  |
|                      |                                  | aprB           | Adenylylsulfate reductase, beta subunit         | Ga0074115_10323                                | Ga0076813_14622            | TevJSym_ag00890        | Rifp1Sym_ej00100         | Rifp2Sym_bz00040                     |                  |
|                      |                                  | dsrA           | Dissimilatory sulfite reductase, alpha subunit  | Ga0074115_12121                                | Ga0076813_15802            | TevJSym_aw00210        | Rifp1Sym_am00340         | Rifp2Sym_aa00430 ; Rifp2Sym_aa00440  |                  |
|                      |                                  | dsrB           | Dissimilatory sulfite reductase, beta subunit   | Ga0074115_12120                                | Ga0076813_15803            | TevJSym_aw00190        | Rifp1Sym_am00350         | Rifp2Sym_aa00410                     |                  |
|                      |                                  | sopT           | ATP sulfurylase                                 | n.d.                                           | n.d.                       | TevJSym_ad01200        | Rifp1Sym_cn00110         | Rifp2Sym_az00240                     |                  |
| 2. Carbon metabolism | 2.1. Calvin Benson Bassham cycle | cbbM           | Ribulose 1,5 bisphosphate carboxylase/oxygenase | Ga0074115_14812                                | Ga0076813_14651            | TevJSym_aj00630        | Rifp1Sym_at00130         | Rifp2Sym_bi00210                     |                  |
|                      |                                  | gapA           | Glyceraldehyde 3 phosphate dehydrogenase        | Ga0074115_12924                                | Ga0076813_16395            | TevJSym_an00400        | Rifp1Sym_dp00070         | Rifp2Sym_ar00120                     |                  |
|                      |                                  | pgk            | Phosphoglycerate kinase                         | Ga0074115_12925                                | Ga0076813_1392             | TevJSym_an00390        | Rifp1Sym_dp00060         | Rifp2Sym_ar00110                     |                  |
|                      |                                  | prkB           | Phosphoribulokinase                             | Ga0074115_1484                                 | Ga0076813_15275            | TevJSym_aj00540        | Rifp1Sym_at00030         | Rifp2Sym_bf00040 ; Rifp2Sym_bf00050  |                  |
|                      |                                  | aclA           | ATP citrate lyase, alpha subunit                | Ga0074115_13717                                | Ga0076813_13921            | TevJSym_az00170        | Rifp1Sym_bt00020         | Rifp2Sym_br00010 ; Rifp2Sym_aa000101 |                  |
|                      |                                  | 2.2. TCA cycle | aclB                                            | ATP citrate lyase, beta subunit                | Ga0074115_13718            | Ga0076813_14412        | TevJSym_az00180          | Rifp1Sym_bt00010                     | Rifp2Sym_br00020 |
|                      |                                  |                | acnA                                            | Aconitate hydratase/aconitase A                | Ga0074115_13715            | Ga0076813_13923        | TevJSym_az00150          | Rifp1Sym_bt00040                     | Rifp2Sym_aa00030 |
|                      |                                  |                | icd                                             | Isocitrate dehydrogenase [NADP]                | Ga0074115_13716            | Ga0076813_13922        | TevJSym_az00160          | Rifp1Sym_bt00030                     | Rifp2Sym_aa00020 |
|                      |                                  |                | korA                                            | 2 oxoglutarate oxidoreductase, alpha subunit 2 | Ga0074115_13621            | Ga0076813_14941        | TevJSym_az00290          | Rifp1Sym_dm00080                     | Rifp2Sym_br00130 |
|                      |                                  |                | Ga0074115_102185                                |                                                | Ga0076813_169112           | TevJSym_bb00050        | Rifp1Sym_aa00580         | Rifp2Sym_an00050                     |                  |
|                      |                                  |                |                                                 | Ga0074115_11633                                | Ga0076813_13526            | TevJSym_ar00630        | Rifp1Sym_bp00050         | Rifp2Sym_ab00620                     |                  |
|                      |                                  |                | korB                                            | 2 oxoglutarate oxidoreductase, beta subunit 2  | Ga0074115_13622            | Ga0076813_14942        | TevJSym_az00280          | Rifp1Sym_dm00070                     | Rifp2Sym_br00120 |
|                      |                                  |                | Ga0074115_102184                                |                                                | Ga0076813_169111           | TevJSym_bb00040        | Rifp1Sym_aa00590         | Rifp2Sym_an00040                     |                  |



[Back to list of tables](#)

**Table S5 Genes of particular interest.** Modified or complemented from Gardebrecht *et al.* (1). n.d.: Not Detected; no sequences were found in this genome assembly; n.a.: Not Annotated; orthologous sequence was found but no genes were detected in this genome assembly. **(Continued)**

1. **Gardebrecht A, Markert S, Sievert SM, Felbeck H, Thürmer A, Albrecht D, Wollherr A, Kabisch J, Le Bris N, Lehmann R.** 2011. Physiological homogeneity among the endosymbionts of *Riftia pachyptila* and *Tevnia jerichonana* revealed by proteogenomics. ISME J 6:766–776.

| Locus-tag in Genbank accessions |               |       |                                                |                            |                            |                        |                                        |                                         |
|---------------------------------|---------------|-------|------------------------------------------------|----------------------------|----------------------------|------------------------|----------------------------------------|-----------------------------------------|
| Categorie                       | Sub-Categorie | Gene  | Function                                       | <i>Ridgeia</i> 1 symbionts | <i>Ridgeia</i> 2 Symbionts | <i>Tevnia</i> symbiont | <i>Riftia</i> 1 symbiont               | <i>Riftia</i> 2 symbiont                |
|                                 |               |       |                                                | Ga0074115_11632            | Ga0076813_13525            | TevJSym_ar00620        | Rifp1Sym_bp00060                       | Rifp2Sym_ab00610                        |
|                                 |               | korD  | 2 oxoglutarate oxidoreductase, delta subunit   | Ga0074115_13620            | Ga0076813_15152            | TevJSym_az00300        | Rifp1Sym_dm00090                       | Rifp2Sym_br00140                        |
|                                 |               | korG  | 2 oxoglutarate oxidoreductase, gamma subunit   | Ga0074115_13623            | Ga0076813_14943            | TevJSym_az00270        | Rifp1Sym_dm00060                       | Rifp2Sym_br00110                        |
|                                 |               | gltA2 | citrate synthase I                             | Ga0074115_1551             | Ga0076813_11841            | TevJSym_bc00420        | Rifp1Sym_ax00310                       | Rifp2Sym_aq00120                        |
|                                 |               | maeB  | malate dehydrogenase                           | Ga0074115_1552             | Ga0076813_11901            | TevJSym_bc00430        | Rifp1Sym_ax00320 ;<br>Rifp1Sym_ax00330 | Rifp2Sym_aq001101<br>; Rifp2Sym_aq00100 |
|                                 |               | sdhA  | Succinate dehydrogenase, flavoprotein subunit2 | Ga0074115_13138            | Ga0076813_15895            | TevJSym_ah01000        | Rifp1Sym_dd00140                       | Rifp2Sym_ez00030                        |
|                                 |               |       |                                                | Ga0074115_1555             | Ga0076813_14861            | TevJSym_cj00010        | Rifp1Sym_ax00360                       | Rifp2Sym_aq000701<br>; Rifp2Sym_aq00060 |
|                                 |               | sdhB  | succinate dehydrogenase iron sulfur protein2   | Ga0074115_13139            | Ga0076813_15896            | TevJSym_ah01010        | Rifp1Sym_dd00150                       | Rifp2Sym_ez00020                        |
|                                 |               |       |                                                | Ga0074115_1556             | Ga0076813_14862            | TevJSym_cj00020        | Rifp1Sym_ax00370                       | Rifp2Sym_aq00050                        |
|                                 |               | sdhC  | succinate dehydrogenase membrane anchor 2      | Ga0074115_13137            | Ga0076813_15894            | TevJSym_ah00990        | Rifp1Sym_dd00130                       | Rifp2Sym_ez00040                        |
|                                 |               |       |                                                | Ga0074115_1554             | Ga0076813_15132            | TevJSym_bc00450        | Rifp1Sym_ax00350                       | Rifp2Sym_aq00080                        |
|                                 |               | sdhD  | succinate dehydrogenase cyt b subunit          | Ga0074115_1553             | Ga0076813_11902            | TevJSym_bc00440        | Rifp1Sym_ax00340                       | Rifp2Sym_aq00090                        |
| 3. Nitrogen metabolism          |               | narG  | Respiratory nitrate reductase, alpha chain     | Ga0074115_10332            | Ga0076813_150210           | TevJSym_ag00800        | Rifp1Sym_ak00460                       | Rifp2Sym_bt00080                        |
|                                 |               | narH  | Respiratory nitrate reductase, beta chain      | Ga0074115_10333            | Ga0076813_15028            | TevJSym_ag00790        | Rifp1Sym_ak00450                       | Rifp2Sym_bt00090                        |
|                                 |               | narJ  | Respiratory nitrate reductase, delta chain     | Ga0074115_10334            | Ga0076813_15027            | TevJSym_ag00780        | Rifp1Sym_ak00440                       | Rifp2Sym_bt00100                        |
|                                 |               | narI  | Respiratory nitrate reductase, gamma chain     | Ga0074115_10335            | Ga0076813_15026            | TevJSym_ag00770        | Rifp1Sym_ak00430                       | Rifp2Sym_bt00110                        |
|                                 |               | napD  | Periplasmic nitrate reductase, subunit NapD    | Ga0074115_1444             | Ga0076813_15362            | TevJSym_al00660        | Rifp1Sym_ao00250                       | Rifp2Sym_bd00210                        |
|                                 |               | napA  | Periplasmic nitrate reductase, subunit NapA    | Ga0074115_1443             | Ga0076813_15361            | TevJSym_al00650        | Rifp1Sym_ao00240 ;<br>Rifp1Sym_ao00230 | Rifp2Sym_bd00220                        |
|                                 |               | napG  | Periplasmic nitrate reductase, subunit NapG    | Ga0074115_1442             | n.d.                       | TevJSym_al00640        | Rifp1Sym_ao00220                       | Rifp2Sym_bd00230                        |

[Back to list of tables](#)

**Table S5 Genes of particular interest.** Modified or complemented from Gardebrecht *et al.* (1). n.d.: Not Detected; no sequences were found in this genome assembly; n.a.: Not Annotated; orthologous sequence was found but no genes were detected in this genome assembly. **(Continued)**

1. **Gardebrecht A, Markert S, Sievert SM, Felbeck H, Thürmer A, Albrecht D, Wollherr A, Kabisch J, Le Bris N, Lehmann R.** 2011. Physiological homogeneity among the endosymbionts of *Riftia pachyptila* and *Tevnia jerichonana* revealed by proteogenomics. *ISME J* 6:766–776.

| Locus-tag in Genbank accessions |               |      |                                                |                            |                            |                        |                                     |                                     |
|---------------------------------|---------------|------|------------------------------------------------|----------------------------|----------------------------|------------------------|-------------------------------------|-------------------------------------|
| Categorie                       | Sub-Categorie | Gene | Function                                       | <i>Ridgeia</i> 1 symbionts | <i>Ridgeia</i> 2 Symbionts | <i>Tevnia</i> symbiont | <i>Riftia</i> 1 symbiont            | <i>Riftia</i> 2 symbiont            |
|                                 |               | napH | Periplasmic nitrate reductase, subunit NapH    | Ga0074115_1441             | n.d.                       | TevJSym_al00630        | Rifp1Sym_ao00210                    | Rifp2Sym_bd00240                    |
|                                 |               | napB | Periplasmic nitrate reductase, subunit NapB    | Ga0074115_1762             | Ga0076813_1782             | TevJSym_al00620        | Rifp1Sym_ao00200                    | Rifp2Sym_bd00240                    |
|                                 |               | napC | Periplasmic nitrate reductase, subunit NapC    | Ga0074115_12753            | Ga0076813_1783             | TevJSym_al00610        | Rifp1Sym_ao00190                    | Rifp2Sym_bd00260                    |
|                                 |               | nirN | Cytochrome cd1/nitrite reductase, subunit NirN | Ga0074115_10211            | Ga0076813_13753            | TevJSym_bo00090        | Rifp1Sym_cp00140                    | Rifp2Sym_db00140                    |
|                                 |               | nirJ | Cytochrome cd1/nitrite reductase, subunit NirJ | Ga0074115_10212            | Ga0076813_12089            | TevJSym_bo00100        | Rifp1Sym_cp00120 ; Rifp1Sym_cp00130 | Rifp2Sym_db00110                    |
|                                 |               | nirH | Cytochrome cd1/nitrite reductase, subunit NirH | Ga0074115_10213            | Ga0076813_12088            | TevJSym_bo00110        | Rifp1Sym_cp00110                    | Rifp2Sym_db00100                    |
|                                 |               | nirG | Cytochrome cd1/nitrite reductase, subunit NirG | Ga0074115_10215            | Ga0076813_12086            | TevJSym_bo00130        | Rifp1Sym_cp00090                    | Rifp2Sym_db00080                    |
|                                 |               | nirL | Cytochrome cd1/nitrite reductase, subunit NirL | Ga0074115_10216            | Ga0076813_12085            | TevJSym_bo00140        | Rifp1Sym_cp00080                    | Rifp2Sym_db00070                    |
|                                 |               | nirD | Cytochrome cd1/nitrite reductase, subunit NirD | Ga0074115_10217            | Ga0076813_12084            | TevJSym_bo00150        | Rifp1Sym_cp00070                    | Rifp2Sym_db00060                    |
|                                 |               | nirF | Cytochrome cd1/nitrite reductase, subunit NirF | Ga0074115_10218            | Ga0076813_12083            | TevJSym_bo00160        | Rifp1Sym_cp00060                    | Rifp2Sym_db00050                    |
|                                 |               | nirC | Cytochrome cd1/nitrite reductase, subunit NirC | Ga0074115_10219            | Ga0076813_12082            | TevJSym_bo00170        | Rifp1Sym_cp00050                    | Rifp2Sym_db00040                    |
|                                 |               | nirT | Cytochrome cd1/nitrite reductase, subunit NirT | Ga0074115_10221            | Ga0076813_10286            | TevJSym_bo00190        | Rifp1Sym_cp00030                    | Rifp2Sym_db00010                    |
|                                 |               | nirS | Cytochrome cd1/nitrite reductase, subunit NirS | Ga0074115_10222            | Ga0076813_10285            | TevJSym_bo00200        | Rifp1Sym_cp00020                    | Rifp2Sym_gn00030                    |
|                                 |               | norB | Nitric oxide reductase subunit B               | Ga0074115_10224            | Ga0076813_10283            | TevJSym_cv00020        | n. a.                               | Rifp2Sym_jh00010                    |
|                                 |               | norC | Nitric oxide reductase subunit C               | Ga0074115_10225            | Ga0076813_10282            | TevJSym_cv00010        | n. a.                               | Rifp2Sym_jh00030                    |
|                                 |               | nosZ | Nitrous oxide reductase                        | Ga0074115_11648            | Ga0076813_16471            | TevJSym_ac00130        | Rifp1Sym_ag00460                    | Rifp2Sym_au00130 ; Rifp2Sym_au00140 |
| 4. Storage compounds            |               | cphA | Cyanophycin synthase                           | Ga0074115_1582             | Ga0076813_12881            | TevJSym_ay00040        | Rifp1Sym_ah00040                    | Rifp2Sym_at00040                    |
| 5. Oxidative stress response    |               | ahpC | Alkyl hydroperoxide reductase                  | Ga0074115_1298             | Ga0076813_1752             | TevJSym_ah00580        | Rifp1Sym_ai00550                    | Rifp2Sym_af00050                    |
|                                 |               | sodB | Superoxide dismutase [Fe]                      | Ga0074115_10415            | Ga0076813_192              | TevJSym_an00790        | Rifp1Sym_eb00070                    | Rifp2Sym_dw00080                    |

[Back to list of tables](#)

**Table S5 Genes of particular interest.** Modified or complemented from Gardebrecht *et al.* (1). n.d.: Not Detected; no sequences were found in this genome assembly; n.a.: Not Annotated; orthologous sequence was found but no genes were detected in this genome assembly. **(Continued)**

1. **Gardebrecht A, Markert S, Sievert SM, Felbeck H, Thürmer A, Albrecht D, Wollherr A, Kabisch J, Le Bris N, Lehmann R.** 2011. Physiological homogeneity among the endosymbionts of *Riftia pachyptila* and *Tevnia jerichonana* revealed by proteogenomics. ISME J 6:766–776.

|                               |                                          |      |                                                                        | Locus-tag in Genbank accessions     |                            |                        |                          |                          |                  |
|-------------------------------|------------------------------------------|------|------------------------------------------------------------------------|-------------------------------------|----------------------------|------------------------|--------------------------|--------------------------|------------------|
| Categorie                     | Sub-Categorie                            | Gene | Function                                                               | <i>Ridgeia</i> 1 symbionts          | <i>Ridgeia</i> 2 Symbionts | <i>Tevnia</i> symbiont | <i>Riftia</i> 1 symbiont | <i>Riftia</i> 2 symbiont |                  |
| 6. Secretion systems          | 6.1. Secretion across the inner membrane | secA | Preprotein translocase subunit SecA                                    | Ga0074115_10789                     | Ga0076813_142814           | TevJSym_aj00210        | Rifp1Sym_bc00080         | Rifp2Sym_ax00280         |                  |
|                               |                                          | secB | Preprotein translocase subunit SecB                                    | Ga0074115_10285                     | Ga0076813_14246            | TevJSym_at00230        | Rifp1Sym_cl00120         | Rifp2Sym_as00170         |                  |
|                               |                                          | secD | Preprotein translocase subunit SecD                                    | Ga0074115_1295                      | Ga0076813_13813            | TevJSym_an00610        | Rifp1Sym_cf00160         | Rifp2Sym_ar00340         |                  |
|                               |                                          | secE | Preprotein translocase subunit SecE                                    | Ga0074115_12212                     | n.d.                       | TevJSym_bu00110        | Rifp1Sym_di00120         | Rifp2Sym_dg00010         |                  |
|                               |                                          | secF | Preprotein translocase subunit SecF                                    | Ga0074115_1296                      | Ga0076813_13814            | TevJSym_an00600        | Rifp1Sym_cf00150         | Rifp2Sym_ar00330         |                  |
|                               |                                          | secG | Preprotein translocase subunit SecG                                    | n.d.                                | n.d.                       | TevJSym_ap00640        | Rifp1Sym_bl00190         | Rifp2Sym_eh00010         |                  |
|                               |                                          | secY | Preprotein translocase subunit SecY                                    | Ga0074115_1496                      | Ga0076813_11654            | TevJSym_aa00220        | Rifp1Sym_bd00210         | Rifp2Sym_ce00130         |                  |
|                               |                                          | tatA | Twin arginine translocation protein TatA                               | Ga0074115_10885                     | Ga0076813_150318           | TevJSym_bh00280        | Rifp1Sym_cq00210         | Rifp2Sym_cb00170         |                  |
|                               |                                          | tatB | Twin arginine translocation protein TatB                               | Ga0074115_10884                     | Ga0076813_150319           | TevJSym_bh00290        | Rifp1Sym_cq00220         | Rifp2Sym_cb00180         |                  |
|                               |                                          | tatC | Twin arginine translocation protein TatC                               | Ga0074115_10883                     | Ga0076813_150320           | TevJSym_bh00300        | Rifp1Sym_cq00230         | Rifp2Sym_cb00190         |                  |
|                               | 6.3. Secretion across the outer membrane | exeA | General secretion pathway protein A 2                                  | Ga0074115_11430                     | Ga0076813_15682            | TevJSym_ab01170        | Rifp1Sym_aa00370         | Rifp2Sym_an00280         |                  |
|                               |                                          |      |                                                                        | Ga0074115_1393                      | Ga0076813_11442            | TevJSym_bg00130        | Rifp1Sym_bk00170         | Rifp2Sym_bh00210         |                  |
|                               |                                          |      |                                                                        | Ga0074115_1331                      | Ga0076813_11735            | TevJSym_bb00270        | Rifp1Sym_aa00370         | Rifp2Sym_an00280         |                  |
|                               |                                          |      |                                                                        | Ga0074115_11330                     | Ga0076813_168710           | TevJSym_ai00590        | Rifp1Sym_cw00160         | Rifp2Sym_cf00120         |                  |
|                               |                                          |      |                                                                        | Ga0074115_11430                     | Ga0076813_15682            | TevJSym_ab01170        | Rifp1Sym_ee00070         | Rifp2Sym_dq00020         |                  |
|                               |                                          |      | xpsD                                                                   | General secretion pathway protein D | Ga0074115_12041            | Ga0076813_12179        | TevJSym_ay00270          | Rifp1Sym_ah00230         | Rifp2Sym_do00140 |
|                               |                                          |      | outE                                                                   | General secretion pathway protein E | Ga0074115_1392             | Ga0076813_11452        | TevJSym_bg00140          | Rifp1Sym_bk00160         | Rifp2Sym_bh00200 |
|                               |                                          |      | xcpR                                                                   | General secretion pathway protein E | Ga0074115_12421            | Ga0076813_15101        | TevJSym_av00370          | Rifp1Sym_ci00020         | Rifp2Sym_be00150 |
|                               |                                          |      | xcpS                                                                   | General secretion pathway protein F | Ga0074115_12420            | Ga0076813_14619        | TevJSym_av00380          | Rifp1Sym_ci00030         | Rifp2Sym_be00160 |
|                               |                                          |      |                                                                        |                                     | Ga0074115_1391             | Ga0076813_11451        | TevJSym_bg00150          | Rifp1Sym_bk00150         | Rifp2Sym_bh00190 |
| 6.4. Type VI secretion system |                                          |      | Zn-binding Pro-Ala-Ala-Arg (PAAR) domain, involved in TypeVI secretion | Ga0074115_1462                      | Ga0076813_11513            | n.d.                   | n.d.                     | n.d.                     |                  |

[Back to list of tables](#)

**Table S5 Genes of particular interest.** Modified or complemented from Gardebrecht *et al.* (1). n.d.: Not Detected; no sequences were found in this genome assembly; n.a.: Not Annotated; orthologous sequence was found but no genes were detected in this genome assembly. **(Continued)**

1. **Gardebrecht A, Markert S, Sievert SM, Felbeck H, Thürmer A, Albrecht D, Wollherr A, Kabisch J, Le Bris N, Lehmann R.** 2011. Physiological homogeneity among the endosymbionts of *Riftia pachyptila* and *Tevnia jerichonana* revealed by proteogenomics. *ISME J* 6:766–776.

| Locus-tag in Genbank accessions |                                 |       |                                                                     |                            |                                   |                        |                          |                          |
|---------------------------------|---------------------------------|-------|---------------------------------------------------------------------|----------------------------|-----------------------------------|------------------------|--------------------------|--------------------------|
| Categorie                       | Sub-Categorie                   | Gene  | Function                                                            | <i>Ridgeia</i> 1 symbionts | <i>Ridgeia</i> 2 Symbionts        | <i>Tevnia</i> symbiont | <i>Riftia</i> 1 symbiont | <i>Riftia</i> 2 symbiont |
|                                 |                                 |       | putative component of the type VI protein secretion system          | Ga0074115_1466             | Ga0076813_14751 ; Ga0076813_16801 | n.d.                   | n.d.                     | n.d.                     |
|                                 |                                 | ImpA  | type VI secretion-associated protein, ImpA family                   | Ga0074115_1469             | Ga0076813_16804                   | n.d.                   | n.d.                     | n.d.                     |
|                                 |                                 | ImpB  | type VI secretion protein, VC_A0107 family                          | Ga0074115_14610            | Ga0076813_16805                   | n.d.                   | n.d.                     | n.d.                     |
|                                 |                                 | ImpC  | type VI secretion protein, EvpB/VC_A0108 family                     | Ga0074115_14611            | Ga0076813_13723                   | n.d.                   | n.d.                     | n.d.                     |
|                                 |                                 | Hcp   | Type VI protein secretion system component Hcp (secreted cytotoxin) | Ga0074115_14612            | Ga0076813_13722                   | n.d.                   | n.d.                     | n.d.                     |
|                                 |                                 | ImpF  | type VI secretion system lysozyme-like protein                      | Ga0074115_14614            | Ga0076813_14483                   | n.d.                   | n.d.                     | n.d.                     |
|                                 |                                 | ImpG  | type VI secretion protein, VC_A0110 family                          | Ga0074115_14615            | Ga0076813_14482                   | n.d.                   | n.d.                     | n.d.                     |
|                                 |                                 | ImpH  | type VI secretion protein, VC_A0111 family                          | Ga0074115_14616            | Ga0076813_14481                   | n.d.                   | n.d.                     | n.d.                     |
| 7. Horizontal gene transfer     | 7.1. F Type conjugative plasmid | traG  | IncF plasmid conjugative transfer protein TraG                      | n.d.                       | n.d.                              | n.d.                   | Rifp1Sym_au00110         | n.a.                     |
|                                 |                                 | traH  | IncF plasmid conjugative transfer pilus assembly protein            | n.d.                       | n.d.                              | n.d.                   | Rifp1Sym_au00120         | n.a.                     |
|                                 |                                 | traF  | IncF plasmid conjugative transfer pilus assembly protein            | n.d.                       | n.d.                              | n.d.                   | Rifp1Sym_au00130         | n.a.                     |
|                                 |                                 | traN  | IncF plasmid conjugative transfer protein TraN                      | n.d.                       | n.d.                              | n.d.                   | Rifp1Sym_au00140         | n.a.                     |
|                                 |                                 | trbC  | IncF plasmid conjugative transfer protein TrbC                      | n.d.                       | n.d.                              | n.d.                   | Rifp1Sym_au00150         | n.a.                     |
|                                 |                                 | traU  | IncF plasmid conjugative transfer pilus assembly protein            | n.d.                       | n.d.                              | n.d.                   | Rifp1Sym_au00160         | n.a.                     |
|                                 |                                 | pat17 | Patatin like phospholipase A2                                       | n.d.                       | n.d.                              | n.d.                   | Rifp1Sym_au00170         | n.a.                     |
|                                 |                                 | traC  | IncF plasmid conjugative transfer pilus assembly protein            | n.d.                       | n.d.                              | n.d.                   | Rifp1Sym_au00200         | n.a.                     |
|                                 |                                 | traV  | Conjugative transfer protein TraV                                   | n.d.                       | n.d.                              | n.d.                   | Rifp1Sym_au00210         | n.a.                     |
|                                 |                                 | traB  | IncF plasmid conjugative transfer pilus assembly protein            | n.d.                       | n.d.                              | n.d.                   | Rifp1Sym_au00230         | n.a.                     |
|                                 |                                 | traK  | IncF plasmid conjugative transfer pilus assembly protein            | n.d.                       | n.d.                              | n.d.                   | Rifp1Sym_au00240         | n.a.                     |
|                                 |                                 | traE  | Plasmid like conjugative transfer protein                           | n.d.                       | n.d.                              | n.d.                   | Rifp1Sym_au00250         | n.a.                     |

[Back to list of tables](#)

**Table S5 Genes of particular interest.** Modified or complemented from Gardebrecht *et al.* (1). n.d.: Not Detected; no sequences were found in this genome assembly; n.a.: Not Annotated; orthologous sequence was found but no genes were detected in this genome assembly. **(Continued)**

1. **Gardebrecht A, Markert S, Sievert SM, Felbeck H, Thürmer A, Albrecht D, Wollherr A, Kabisch J, Le Bris N, Lehmann R.** 2011. Physiological homogeneity among the endosymbionts of *Riftia pachyptila* and *Tevnia jerichonana* revealed by proteogenomics. *ISME J* 6:766–776.

|                                        |                                         |      |                                          | Locus-tag in Genbank accessions             |                            |                                      |                                        |                          |                  |
|----------------------------------------|-----------------------------------------|------|------------------------------------------|---------------------------------------------|----------------------------|--------------------------------------|----------------------------------------|--------------------------|------------------|
| Categorie                              | Sub-Categorie                           | Gene | Function                                 | <i>Ridgeia</i> 1 symbionts                  | <i>Ridgeia</i> 2 Symbionts | <i>Tevnia</i> symbiont               | <i>Riftia</i> 1 symbiont               | <i>Riftia</i> 2 symbiont |                  |
|                                        |                                         |      | TraE                                     |                                             |                            |                                      |                                        |                          |                  |
| 7. Horizontal gene transfer            | 7.2. Transposases                       |      | ISSY transposase                         | n.d.                                        | n.d.                       | TevJSym_bc00030                      | Rifp1Sym_al00300                       | Rifp2Sym_aw00230         |                  |
|                                        |                                         |      | Transposase IS66                         | Ga0074115_1614                              | Ga0076813_13865            | TevJSym_el00010                      | n.d.                                   | Rifp2Sym_mp00010         |                  |
|                                        |                                         |      |                                          | Ga0074115_1615                              | Ga0076813_13866            | n.a                                  | n.a                                    | n.a                      |                  |
|                                        |                                         |      | Transposase                              | Ga0074115_102126                            | Ga0076813_169033           | TevJSym_aq00210                      | Rifp1Sym_ae00170                       | Rifp2Sym_bm00130         |                  |
|                                        |                                         |      |                                          | Ga0074115_10991                             | Ga0076813_1302             | TevJSym_ar00260                      | Rifp1Sym_bh00140                       | Rifp2Sym_ab00230         |                  |
|                                        |                                         |      |                                          | Ga0074115_1654                              | Ga0076813_10561            | TevJSym_ck00010                      | Rifp1Sym_db00090                       | Rifp2Sym_gs00010         |                  |
|                                        |                                         |      |                                          | Ga0074115_12166                             | Ga0076813_16881            | n.d.                                 | n.d.                                   | n.d.                     |                  |
|                                        |                                         |      |                                          | Ga0074115_11443                             | Ga0076813_12739            | n.d.                                 | n.d.                                   | n.d.                     |                  |
|                                        |                                         |      |                                          | Ga0074115_1652                              | Ga0076813_10563            | n.d.                                 | n.d.                                   | n.d.                     |                  |
|                                        |                                         |      |                                          | Ga0074115_102124                            | Ga0076813_169035           | n.d.                                 | n.d.                                   | n.d.                     |                  |
|                                        |                                         |      |                                          | Ga0074115_1651                              | Ga0076813_10564            | n.d.                                 | n.d.                                   | n.d.                     |                  |
|                                        |                                         |      |                                          | Ga0074115_102125                            | Ga0076813_169034           | n.d.                                 | n.d.                                   | n.d.                     |                  |
|                                        |                                         |      |                                          | IS5 transposase                             | n.d                        | n.d                                  | TevJSym_bc00040                        | Rifp1Sym_al00310         | Rifp2Sym_aw00240 |
|                                        |                                         |      |                                          | Transposase insF for insertion sequence IS3 | n.a                        | n.a                                  | TevJSym_ab01630                        | Rifp1Sym_bb00110         | Rifp2Sym_dh00120 |
|                                        | Transposase for IS1668                  | n.d  | n.d                                      | TevJSym_bf00240                             | Rifp1Sym_bg00180           | Rifp2Sym_bl00030                     |                                        |                          |                  |
|                                        | Transposase, IS4 family                 | n.a  | n.a                                      | TevJSym_cx00010                             | Rifp1Sym_db00080           | Rifp2Sym_jp00010                     |                                        |                          |                  |
| 8. Possibly involved in host infection | 8.1. Adherence by type IV pili/fimbriae | fimT | Type IV fimbrial biogenesis protein FimT | Ga0074115_11736                             | Ga0076813_159923           | TevJSym_am00340                      | Rifp1Sym_aq00380                       | Rifp2Sym_ak00170         |                  |
|                                        |                                         |      |                                          | Ga0074115_12515                             | Ga0076813_14637            | TevJSym_bs00040                      | Rifp1Sym_et00070                       | Rifp2Sym_da00030         |                  |
|                                        |                                         | fimV | Type IV pilus assembly protein FimV      | Ga0074115_10978                             | Ga0076813_15952            | TevJSym_ar00130 ;<br>TevJSym_ar00120 | Rifp1Sym_dy00010 ;<br>Rifp1Sym_dy00020 | Rifp2Sym_ab00080         |                  |
|                                        |                                         |      |                                          |                                             |                            |                                      |                                        |                          |                  |
|                                        |                                         | pilB | Type IV fimbrial assembly protein PilB   | Ga0074115_11359                             | Ga0076813_139111           | TevJSym_ai00290                      | Rifp1Sym_az00200                       | Rifp2Sym_ba00260         |                  |
|                                        |                                         |      |                                          | Ga0074115_11426                             | Ga0076813_14567            | TevJSym_ab01140                      | Rifp1Sym_ee00030                       | Rifp2Sym_dq00060         |                  |
|                                        |                                         | pilE | Type IV pilus biogenesis protein PilE    | Ga0074115_11742                             | Ga0076813_159917           | TevJSym_am00410                      | Rifp1Sym_an00070                       | Rifp2Sym_ak00100         |                  |
|                                        |                                         |      |                                          |                                             |                            |                                      |                                        |                          |                  |

[Back to list of tables](#)

**Table S5 Genes of particular interest.** Modified or complemented from Gardebrecht *et al.* (1). n.d.: Not Detected; no sequences were found in this genome assembly; n.a.: Not Annotated; orthologous sequence was found but no genes were detected in this genome assembly. **(Continued)**

1. **Gardebrecht A, Markert S, Sievert SM, Felbeck H, Thürmer A, Albrecht D, Wollherr A, Kabisch J, Le Bris N, Lehmann R.** 2011. Physiological homogeneity among the endosymbionts of *Riftia pachyptila* and *Tevnia jerichonana* revealed by proteogenomics. *ISME J* 6:766–776.

| Locus-tag in Genbank accessions |                             |      |                                                       |                            |                            |                        |                                                              |                                        |
|---------------------------------|-----------------------------|------|-------------------------------------------------------|----------------------------|----------------------------|------------------------|--------------------------------------------------------------|----------------------------------------|
| Categorie                       | Sub-Categorie               | Gene | Function                                              | <i>Ridgeia</i> 1 symbionts | <i>Ridgeia</i> 2 Symbionts | <i>Tevnia</i> symbiont | <i>Riftia</i> 1 symbiont                                     | <i>Riftia</i> 2 symbiont               |
|                                 |                             | pilG | twitching motility protein PilG                       | Ga0074115_14215            | Ga0076813_11134            | TevJSym_bn00040        | Rifp1Sym_cb00050                                             | Rifp2Sym_cj00200                       |
|                                 |                             | pilH | twitching motility protein PilH                       | Ga0074115_14214            | Ga0076813_11965            | TevJSym_bn00030        | Rifp1Sym_cb00040                                             | Rifp2Sym_cj00210                       |
|                                 |                             | pilM | Type IV pilus biogenesis protein PilM                 | Ga0074115_102194           | Ga0076813_12694            | TevJSym_bb00140        | Rifp1Sym_aa00490                                             | Rifp2Sym_an00140                       |
|                                 |                             | pilN | Type IV pilus biogenesis protein PilN                 | Ga0074115_102195           | Ga0076813_12695            | TevJSym_bb00150        | Rifp1Sym_aa00480                                             | Rifp2Sym_an00150                       |
|                                 |                             |      |                                                       | Ga0074115_12033            | Ga0076813_113526           | TevJSym_ay00340        | Rifp1Sym_ah00310                                             | Rifp2Sym_do00050                       |
|                                 |                             | pilQ | Type IV pilus biogenesis protein PilQ                 | Ga0074115_102198           | Ga0076813_12698            | TevJSym_bb00180        | Rifp1Sym_aa00450                                             | Rifp2Sym_an00180                       |
|                                 |                             | pilR | Type IV fimbriae expression regulatory protein PilR   | Ga0074115_11363            | Ga0076813_10808            | TevJSym_ai00250        | Rifp1Sym_az00160                                             | Rifp2Sym_ba00220                       |
|                                 |                             | pilS | Sensor protein PilS                                   | Ga0074115_11364            | Ga0076813_10807            | TevJSym_ai00240        | Rifp1Sym_az00150                                             | Rifp2Sym_ba00210                       |
|                                 |                             | pilT | Twitching mobility protein PilT                       | Ga0074115_11726            | Ga0076813_12482            | TevJSym_am00210        | Rifp1Sym_aq00280                                             | Rifp2Sym_ak00290                       |
|                                 |                             | pilV | Type IV pilus modification protein PilV               | Ga0074115_11737            | Ga0076813_159922           | TevJSym_am00350        | Rifp1Sym_aq00390                                             | Rifp2Sym_ak00160                       |
|                                 |                             | pilY | Type IV fimbrial biogenesis protein PilY              | Ga0074115_11740            | Ga0076813_159924           | TevJSym_am00390        | Rifp1Sym_an00030 ;<br>Rifp1Sym_an00040 ;<br>Rifp1Sym_an00050 | Rifp2Sym_ak00130 ;<br>Rifp2Sym_ak00120 |
|                                 |                             | pilZ | Type IV pilus assembly PilZ                           | Ga0074115_11818            | Ga0076813_12504            | TevJSym_bc00220        | Rifp1Sym_ax00100                                             | Rifp2Sym_aq00310                       |
|                                 |                             | TadD | Flp pilus assembly protein TadD, contains TPR repeats | Ga0074115_12218            | Ga0076813_16271            | TevJSym_bt00010        | Rifp1Sym_fu00030                                             | Rifp2Sym_ct00190                       |
|                                 |                             | pilO | Tfp pilus assembly protein PilO                       | Ga0074115_102196           | Ga0076813_12696            | TevJSym_bb00160        | Rifp1Sym_aa00470                                             | Rifp2Sym_an00160                       |
|                                 |                             | pilX | Tfp pilus assembly protein PilX                       | Ga0074115_11739            | Ga0076813_159920           | TevJSym_am00380        | Rifp1Sym_an00020                                             | Rifp2Sym_ak00140                       |
|                                 |                             | pilP | Tfp pilus assembly protein PilP                       | Ga0074115_102197           | Ga0076813_12697            | TevJSym_bb00170        | Rifp1Sym_aa00460                                             | Rifp2Sym_an00170                       |
|                                 | 8.2. Adherence by flagellum | mshL | Pilus (MSHA Type) biogenesis protein MshL             | Ga0074115_1395             | Ga0076813_13261            | TevJSym_bg00100        | Rifp1Sym_bk00190                                             | Rifp2Sym_bh00230                       |
|                                 |                             | flaG | Flagellin protein FlaG                                | Ga0074115_1433             | Ga0076813_12133            | TevJSym_aa01600        | Rifp1Sym_fp00070                                             | Rifp2Sym_bk00240                       |
|                                 |                             | fleN | Flagellar synthesis regulator FleN                    | Ga0074115_12148            | Ga0076813_12351            | TevJSym_aw00490        | Rifp1Sym_am00080                                             | Rifp2Sym_aa00690                       |
|                                 |                             | flgA | Flagellar basal body P ring formation protein FlgA    | Ga0074115_13818            | Ga0076813_14258            | TevJSym_aa01200        | Rifp1Sym_bw00270                                             | Rifp2Sym_aj00140                       |

[Back to list of tables](#)

**Table S5 Genes of particular interest.** Modified or complemented from Gardebrecht *et al.* (1). n.d.: Not Detected; no sequences were found in this genome assembly; n.a.: Not Annotated; orthologous sequence was found but no genes were detected in this genome assembly. **(Continued)**

1. **Gardebrecht A, Markert S, Sievert SM, Felbeck H, Thürmer A, Albrecht D, Wollherr A, Kabisch J, Le Bris N, Lehmann R.** 2011. Physiological homogeneity among the endosymbionts of *Riftia pachyptila* and *Tevnia jerichonana* revealed by proteogenomics. *ISME J* 6:766–776.

| Locus-tag in Genbank accessions |               |      |                                                                                             |                            |                            |                        |                          |                          |
|---------------------------------|---------------|------|---------------------------------------------------------------------------------------------|----------------------------|----------------------------|------------------------|--------------------------|--------------------------|
| Categorie                       | Sub-Categorie | Gene | Function                                                                                    | <i>Ridgeia</i> 1 symbionts | <i>Ridgeia</i> 2 Symbionts | <i>Tevnia</i> symbiont | <i>Riftia</i> 1 symbiont | <i>Riftia</i> 2 symbiont |
|                                 |               | fldG | Flagellar hook protein FlgG                                                                 | Ga0074115_13812            | Ga0076813_14252            | TevJSym_aa01270        | Rifp1Sym_bw00200         | Rifp2Sym_aj00080         |
|                                 |               | flgE | Flagellar hook protein FlgE                                                                 | Ga0074115_13814            | Ga0076813_14254            | TevJSym_aa01250        | Rifp1Sym_bw00220         | Rifp2Sym_aj00100         |
|                                 |               | flgF | Flagellar basal body rod protein FlgF                                                       | Ga0074115_13813            | Ga0076813_14253            | TevJSym_aa01260        | Rifp1Sym_bw00210         | Rifp2Sym_aj00090         |
|                                 |               | flgH | Flagellar L ring protein FlgH                                                               | Ga0074115_13811            | Ga0076813_14251            | TevJSym_aa01280        | Rifp1Sym_bw00190         | Rifp2Sym_aj00070         |
|                                 |               | flhA | Flagellar biosynthesis protein FlhA                                                         | Ga0074115_12150            | Ga0076813_16232            | TevJSym_aw00510        | Rifp1Sym_am00060         | Rifp2Sym_aa00720         |
|                                 |               | fliA | RNA polymerase sigma factor for flagellar operon                                            | Ga0074115_12147            | Ga0076813_14524            | TevJSym_aw00480        | Rifp1Sym_am00090         | Rifp2Sym_aa00680         |
|                                 |               | fliD | Flagellar hook associated protein 2                                                         | Ga0074115_1432             | Ga0076813_12134            | TevJSym_aa01610        | Rifp1Sym_fp00060         | Rifp2Sym_bk00250         |
|                                 |               | fliG | Flagellar motor switch protein Flig                                                         | Ga0074115_1197             | Ga0076813_12727            | TevJSym_ac00750        | Rifp1Sym_cx00180         | Rifp2Sym_cm00100         |
|                                 |               | fliJ | Flagellar protein FliJ                                                                      | Ga0074115_1194             | Ga0076813_12724            | TevJSym_ac00720        | Rifp1Sym_ck00160         | Rifp2Sym_cm00060         |
|                                 |               | fliM | Flagellar motor switch protein FliM                                                         | Ga0074115_12157            | Ga0076813_12633            | TevJSym_aw00580        | n.d.                     | Rifp2Sym_aa00790         |
|                                 |               | flgB | Flagellar basal-body rod protein FlgB                                                       | Ga0074115_13817            | Ga0076813_14257            | TevJSym_aa01210        | Rifp1Sym_bw00260         | Rifp2Sym_aj00130         |
|                                 |               | FliL | Flagellar basal body-associated protein FliL                                                | Ga0074115_1347             | Ga0076813_155326           | TevJSym_ah00540        | Rifp1Sym_ai00510         | Rifp2Sym_af00090         |
|                                 |               |      |                                                                                             | Ga0074115_12158            | Ga0076813_12632            | TevJSym_aw00590        | Rifp1Sym_ct00020         | Rifp2Sym_aa00800         |
|                                 |               | FliO | flagellar biosynthetic protein FliO                                                         | Ga0074115_12155            | Ga0076813_12635            | TevJSym_aw00560        | Rifp1Sym_am00010         | Rifp2Sym_aa00770         |
|                                 |               | GldG | ABC-type uncharacterized transport system involved in gliding motility, auxiliary component | Ga0074115_1173             | Ga0076813_12682            | TevJSym_ai00040        | Rifp1Sym_aq00050         | Rifp2Sym_ba00010         |
|                                 |               | flgC | flagellar basal-body rod protein FlgC                                                       | Ga0074115_13816            | Ga0076813_14256            | TevJSym_aa01220        | Rifp1Sym_bw00250         | Rifp2Sym_aj00120         |
|                                 |               | FlgG | flagellar basal-body rod protein FlgG, Gram-negative bacteria                               | Ga0074115_13812            | Ga0076813_14252            | TevJSym_aa01270        | Rifp1Sym_bw00200         | Rifp2Sym_aj00080         |
|                                 |               | FlgI | Flagellar basal body P-ring protein FlgI                                                    | Ga0074115_13810            | Ga0076813_13251            | TevJSym_aa01290        | Rifp1Sym_bw00180         | Rifp2Sym_aj00060         |
|                                 |               | FlgL | flagellar hook-associated protein 3                                                         | Ga0074115_1387             | Ga0076813_1246             | TevJSym_aa01320        | Rifp1Sym_bw00140         | Rifp2Sym_aj00030         |
|                                 |               | FlhF | flagellar biosynthetic protein FlhF                                                         | Ga0074115_12149            | Ga0076813_12352            | TevJSym_aw00500        | Rifp1Sym_am00070         | Rifp2Sym_aa00710         |
|                                 |               | motA | Flagellar motor rotation protein motA                                                       | Ga0074115_12143            | Ga0076813_1553             | TevJSym_aw00430        | Rifp1Sym_am00130         | Rifp2Sym_aa00640         |
|                                 |               |      |                                                                                             | Ga0074115_12447            | Ga0076813_164510           | TevJSym_av00100        | Rifp1Sym_av00240         | Rifp2Sym_ci00070         |
|                                 |               | motB | Flagellar motor rotation protein motB                                                       | Ga0074115_10496            | Ga0076813_13374            | TevJSym_bi00240        | Rifp1Sym_cj00080         | Rifp2Sym_ai00430         |
|                                 |               |      |                                                                                             | Ga0074115_12448            | Ga0076813_15591            | TevJSym_av00090        | Rifp1Sym_av00250         | Rifp2Sym_ci00060         |
|                                 |               |      |                                                                                             | Ga0074115_12142            | Ga0076813_1552             | TevJSym_aw00420        | Rifp1Sym_am00140         | Rifp2Sym_aa00630         |

[Back to list of tables](#)

**Table S5 Genes of particular interest.** Modified or complemented from Gardebrecht *et al.* (1). n.d.: Not Detected; no sequences were found in this genome assembly; n.a.: Not Annotated; orthologous sequence was found but no genes were detected in this genome assembly. **(Continued)**

1. **Gardebrecht A, Markert S, Sievert SM, Felbeck H, Thürmer A, Albrecht D, Wollherr A, Kabisch J, Le Bris N, Lehmann R.** 2011. Physiological homogeneity among the endosymbionts of *Riftia pachyptila* and *Tevnia jerichonana* revealed by proteogenomics. *ISME J* 6:766–776.

| Categorie | Sub-Categorie        | Gene   | Function                              | Locus-tag in Genbank accessions  |                                 |                        |                          |                                         |
|-----------|----------------------|--------|---------------------------------------|----------------------------------|---------------------------------|------------------------|--------------------------|-----------------------------------------|
|           |                      |        |                                       | <i>Ridgeia</i> 1 symbionts       | <i>Ridgeia</i> 2 Symbionts      | <i>Tevnia</i> symbiont | <i>Riftia</i> 1 symbiont | <i>Riftia</i> 2 symbiont                |
|           | 8.3. Cell attachment | FliK   | Flagellar hook length control protein | <a href="#">Ga0074115_11949</a>  | <a href="#">Ga0076813_12961</a> | TevJSym_ac01170        | Rifp1Sym_da00090         | Rifp2Sym_ay00290                        |
|           |                      | hlyIII | Hemolysin III like protein            | <a href="#">Ga0074115_10985</a>  | <a href="#">Ga0076813_11011</a> | TevJSym_ar00200        | Rifp1Sym_bh00190         | Rifp2Sym_ab00180                        |
|           |                      | TlyC   | Putative Hemolysin C                  | <a href="#">Ga0074115_1751</a>   | <a href="#">Ga0076813_14012</a> | TevJSym_bc00400        | Rifp1Sym_ax00290         | Rifp2Sym_aq00130                        |
|           |                      | hlyD   | Type I secretion protein, HlyD family | <a href="#">Ga0074115_101107</a> | <a href="#">Ga0076813_16091</a> | <b>TevJSym_ao00270</b> | Rifp1Sym_ac00300         | Rifp2Sym_dc00070                        |
|           |                      |        |                                       | <a href="#">Ga0074115_10993</a>  | <a href="#">Ga0076813_1304</a>  | TevJSym_ar00280        | Rifp1Sym_bh00120         | Rifp2Sym_ab00250                        |
|           |                      |        |                                       | <a href="#">Ga0074115_1373</a>   | <a href="#">Ga0076813_11203</a> | TevJSym_az00030        | Rifp1Sym_bt00160         | Rifp2Sym_aa00180                        |
|           |                      | kamA   | Lysine 2,3 aminomutase                | <a href="#">Ga0074115_12934</a>  | <a href="#">Ga0074115_11543</a> | TevJSym_an00300        | Rifp1Sym_ey00040         | Rifp2Sym_ar00010                        |
|           |                      | cvpA   | Colicin V production protein          | <a href="#">Ga0074115_12444</a>  | <a href="#">Ga0076813_16457</a> | TevJSym_av00130        | Rifp1Sym_av00210         | Rifp2Sym_ci00100                        |
|           |                      |        | Outer membrane adhesin like protein   | <a href="#">Ga0074115_13915</a>  | <a href="#">Ga0076813_12205</a> | TevJSym_ae00280        | Rifp1Sym_gp00020         | Rifp2Sym_fz00070                        |
|           |                      |        |                                       | <a href="#">Ga0074115_11649</a>  | <a href="#">Ga0076813_16472</a> | TevJSym_ac00140        | Rifp1Sym_ag00450         | Rifp2Sym_au00150                        |
|           |                      |        | Hyalin                                | <a href="#">Ga0074115_11167</a>  | <a href="#">Ga0076813_11761</a> | TevJSym_bf00250        | Rifp1Sym_bg00190         | Rifp2Sym_bl00010 ;<br>Rifp2Sym_bl00020  |
|           |                      |        | Fibronectin Type III domain protein   | <a href="#">Ga0074115_10729</a>  | <a href="#">Ga0076813_12454</a> | TevJSym_au00400        | Rifp1Sym_bo00250         | Rifp2Sym_al001101 ;<br>Rifp2Sym_al00120 |
|           |                      |        | Cell wall associated biofilm protein  | <a href="#">Ga0074115_1301</a>   | <a href="#">Ga0076813_12431</a> | TevJSym_ay00010        | Rifp1Sym_ah00020         | Rifp2Sym_at000101 ;<br>Rifp2Sym_at00020 |
